1 **Pervasive horizontal pleiotropy in human genetic variation is**  
2 **driven by extreme polygenicity of human traits and diseases**

3 Daniel M. Jordan, Ph.D.<sup>1,2,3\*</sup>, Marie Verbanck, Ph.D.<sup>1,2,3\*</sup>, Ron Do, Ph.D.<sup>1,2,3</sup>

4

5 <sup>1</sup>The Charles Bronfman Institute for Personalized Medicine, Icahn School of Medicine at  
6 Mount Sinai, 1468 Madison Avenue, New York, NY, USA

7 <sup>2</sup>The Icahn Institute for Genomics and Multiscale Biology, Icahn School of Medicine at  
8 Mount Sinai, 1425 Madison Ave, New York, NY, USA

9 <sup>3</sup>Department of Genetics and Genomic Sciences, Icahn School of Medicine at Mount Sinai,  
10 1425 Madison Avenue, New York, NY, USA

11 \*Dr. Jordan and Dr. Verbanck contributed equally to this work.

12

13 Addresses for correspondence:

14 Ron Do, Ph.D.

15 The Charles Bronfman Institute for Personalized Medicine

16 Department of Genetics and Genomic Sciences

17 Icahn School of Medicine at Mount Sinai

18 One Gustave L. Levy Pl., Box 1003

19 New York, NY 10029

20 Email: ron.do@mssm.edu

21 Tel: 212-241-6206

## 22 **Abstract**

23 Horizontal pleiotropy, where one variant has independent effects on multiple traits, is important  
24 for our understanding of the genetic architecture of human phenotypes. We developed a  
25 method to quantify horizontal pleiotropy using genome-wide association summary statistics and  
26 applied it to 372 heritable phenotypes measured in 361,194 UK Biobank individuals. We  
27 observed horizontal pleiotropy is: 1) pervasive throughout the human genome; 2) especially  
28 prominent among highly polygenic phenotypes; 3) detected in 24,968 variants in 7,831 loci; and  
29 4) enriched in active regulatory regions. Our results highlight the central role horizontal  
30 pleiotropy plays in the genetic architecture of human phenotypes.

## 31 **Keywords**

32 Pleiotropy, Polygenicity, Genetic Architecture, GWAS, Statistical Method, R Package

## 33 **Background**

34 The term “pleiotropy” refers to a single genetic variant having multiple distinct phenotypic  
35 effects. In general terms, the existence and extent of pleiotropy has far-reaching implications on  
36 our understanding of how genotypes map to phenotypes (1), of the genetic architectures of  
37 traits (2,3), of the biology underlying common diseases (4) and of the dynamics of natural  
38 selection (5). However, beyond this general idea of the importance of pleiotropy, it quickly  
39 becomes difficult to discuss in specifics, because of the difficulty in defining what counts as a  
40 direct causal effect and what counts as a separate phenotypic effect.

41 One particularly important dividing line in these conflicting definitions is the distinction between  
42 vertical pleiotropy and horizontal pleiotropy (6,7). When a genetic variant has a phenotypic  
43 effect that then has its own downstream effects in turn, that variant exhibits “vertical” pleiotropy.

44 For example, a variant that increases low density lipoprotein (LDL) cholesterol might also have  
45 an additional corresponding effect on coronary artery disease risk due to the causal relationship  
46 between these two traits, thus exhibiting vertical pleiotropy. Vertical pleiotropy has been  
47 conceptualized and measured by explicit genetic methods like Mendelian randomization.

48 In contrast, a genetic cause that directly influences multiple traits, without one trait being  
49 mediated by another, would exhibit “horizontal” pleiotropy. Horizontal pleiotropy contains some  
50 conceptual difficulties, and consequently can be difficult to measure. In principle, we might  
51 imagine selecting a variant and counting how many phenotypes are associated with it. Indeed,  
52 several versions of this analysis have been performed for different lists of traits (8,2,3,9).  
53 However, the results of these analyses are highly dependent on the exact list of traits used, and  
54 traits of interest to researchers previously tend to involve only a small number of phenotypes  
55 and/or be heavily biased towards a small set of disease-relevant biological systems and  
56 processes. Due to these limitations, it is unknown to what extent horizontal pleiotropy affects  
57 genetic variation in the human genome at the genome-wide level.

58 The proliferation of data sources like large-scale biobanks and metabolomics data that include a  
59 wide array of phenotypes in one dataset, combined with the growing public availability of  
60 genome-wide association studies (GWASs) summary statistic data, especially for extremely  
61 large meta-analyses, has allowed the development of methods that use these summary  
62 statistics to gain insight into human biology, and particularly into the genetic architecture of  
63 complex traits and diseases (10).

64 Here, we present a method to measure horizontal pleiotropy using publicly available GWAS  
65 summary statistics. We focus on measuring horizontal pleiotropy of SNVs on observable traits,  
66 meaning a scenario where a single SNV affects multiple phenotypes without relying on a  
67 detectable causal relationship between those phenotypes. Using this framework, we are able to

68 score each SNV in the human genome for horizontal pleiotropy, giving us broad insight into the  
69 genetic architecture of pleiotropy. Because our framework explicitly removes correlations  
70 between the input phenotypes, and because these phenotypes represent a diverse array of  
71 traits and diseases, these insights are largely robust to the specific list of traits studied, and  
72 pertain to human biology overall rather than relationships between specific traits.

## 73 **Results**

### 74 **Defining pleiotropy**

75 We narrowly define the scope of pleiotropy as applying only to genetic variants, and particularly  
76 variants investigated as part of GWASs. As effects, we are considering phenotypic outcomes  
77 measured by GWASs. By our definition, then, pleiotropy means that one variant shows  
78 significant associations across GWASs of multiple traits. We additionally restrict the scope of  
79 pleiotropy we are considering to include only horizontal pleiotropy, and to exclude vertical  
80 pleiotropy (**Figure 1**). To elaborate on this distinction, suppose we have identified a variant that  
81 influences two different traits, trait A and trait B. In vertical pleiotropy, the traits themselves are  
82 biologically related, so that the variant's effect on trait A actually causes the effect on trait B. A  
83 key feature of vertical pleiotropy is that two traits that are biologically related should be related  
84 regardless of which specific gene or variant is causing the effect. This induces correlation  
85 between GWAS effect sizes on the two traits across an entire set of variants. For example, we  
86 expect that *any* variant that increases LDL cholesterol also increases risk of coronary artery  
87 disease, because we suspect that it is the increase in LDL cholesterol itself that causes  
88 increased disease risk. This results in a correlation between variant effect sizes for LDL  
89 cholesterol and coronary artery disease, which has been detected in multiple studies (11–13).  
90 The methodology of Mendelian Randomization uses this predicted correlation within a given set

91 of variants to formulate a statistical test for causal relationships among traits, which is now  
92 widely used for biological discovery (14,15). We extend this methodology to use the entire set of  
93 SNVs evaluated by GWAS, treating a GWAS-wide correlation between two traits as evidence of  
94 a vertical pleiotropic relationship between these traits.

95 In the case of horizontal pleiotropy, an individual variant acts on traits A and B without mirroring  
96 any trait-level relationship between them. Unlike vertical pleiotropy, since we are not considering  
97 the variant-level effect as evidence of a relationship between the two traits, we cannot detect  
98 horizontal pleiotropy by detecting correlations between traits. Instead, each horizontally  
99 pleiotropic variant acts by its own unique mechanism. These particular pleiotropic variants,  
100 therefore, should show a relationship between the two traits that deviates from the relationship  
101 we would infer from the genome-wide correlation of effect sizes between them. This deviation  
102 from the correlation between traits is not a prediction of any kind of model of pleiotropy, but  
103 simply follows from our definition of the term “horizontal pleiotropy”: any pair of traits whose  
104 effect sizes are correlated across all variants is by definition related by vertical pleiotropy, while  
105 any variant whose effects on two traits substantially deviate from the trait-level relationship  
106 between those traits is by definition exhibiting horizontal pleiotropy.

## 107 **A quantitative score for pleiotropy**

108 We have developed a method to measure horizontal pleiotropy using summary statistics data  
109 from GWASs on multiple traits. Our method relies on applying a statistical whitening procedure  
110 to a set of input variant-trait associations, which removes correlations between traits caused by  
111 vertical pleiotropy and normalizes effect sizes across all traits. Using the decorrelated  
112 association Z-scores, we measure two related but distinct components of pleiotropy: the total  
113 magnitude of effect on whitened traits (“magnitude” score, denoted  $P_m$ ) and the total number of  
114 whitened traits affected by a variant (“number of traits” score, denoted  $P_n$ ). Both scores are then

115 scaled by the number of traits and multiplied by 100, so that the final score represents the value  
116 as it would be measured in a dataset of 100 traits. This two-component quantitative pleiotropy  
117 score allows us to measure both the magnitude (pleiotropy magnitude score  $P_m$ ) and quantity  
118 (pleiotropy number of traits score  $P_n$ ) of horizontal pleiotropy for all SNVs in the human genome.  
119 In principle these are distinct quantities: the magnitude score  $P_m$  measures the total pleiotropic  
120 effect size of a variant across all traits, while the number of traits score  $P_n$  measures the number  
121 of distinct pleiotropic effects a variant has. A variant with a high  $P_m$  score and a low  $P_n$  score has  
122 a large effect spread over a small number of traits; a variant with a low  $P_m$  score and a high  $P_n$   
123 score has only a minor effect overall, but that effect is spread out across a large number of  
124 traits; and a variant with high scores on both components has a large effect that is spread  
125 across a large number of traits. Since we expect these scores to be heavily influenced by  
126 linkage disequilibrium (LD), we regress  $P_m$  and  $P_n$  against LD scores to produce an LD-  
127 corrected score ( $P_m^{LD}$  and  $P_n^{LD}$ ) (**Figures 2, 3; Methods**).

## 128 **Calculating significance of pleiotropy**

129 We compute *P-values* for the two components of our pleiotropy score using two different  
130 procedures, corresponding to two different null expectations.

- 131 1. Theoretical *P-values* (Raw pleiotropy score [ $P_m$  and  $P_n$ ] or LD-corrected pleiotropy score  
132 [ $P_m^{LD}$  and  $P_n^{LD}$ ]), calculated analogously to *P-values* for genetic association studies  
133 including GWAS, based on a null scenario where variants do not exhibit pleiotropic  
134 effects on observed traits.
- 135 2. Empirical *P-values* (Polygenicity/LD-corrected pleiotropy score [ $P_m^P$  and  $P_n^P$ ]), calculated  
136 by permutation of the observed distributions of whitened traits. These *P-values* are  
137 based on a null scenario where variants may have significant effects on one or more

138 traits, but the effects of each variant on each trait are independent and the number of  
139 variants with effects on multiple traits is no more than would be expected by chance.

140 This empirical correction for polygenicity is required because polygenicity is a major factor that  
141 can produce pleiotropy. For example, it has been estimated that approximately 100,000  
142 independent loci are causal for height in humans (16). If the total number of independent loci in  
143 the human genome is approximately 1 million, this corresponds to about 10% of the human  
144 genome having an effect on height. If we imagine multiple phenotypes with this same highly  
145 polygenic genetic architecture, we should expect substantial overlap between causal loci for  
146 multiple different traits, even in the absence of any true causal relationship between the traits,  
147 resulting in horizontal pleiotropy (**Figure 2**).

## 148 **Power to detect pleiotropy in simulations**

149 We conducted a simulation study to evaluate the performance of our two-component pleiotropy  
150 score. We simulated 800,000 variants controlling 100 traits, varying the per-trait liability scale  
151 heritability of all traits  $h^2$  and the proportion of pleiotropic and non-pleiotropic causal variants. To  
152 introduce LD in the simulations, we used real LD architecture from 800000 SNVs from 1000  
153 Genomes European population. We simulated Z-scores independently for each SNV and then  
154 propagate LD for a given SNV by “contaminating” its Z-score according to the Z-scores of the  
155 SNVs in LD with it. Under the null model, all trait-variant associations were independent, and no  
156 horizontal pleiotropy was added. Under the added-pleiotropy models, we randomly chose a  
157 fraction of causal variants and forced them to have simultaneous associations with multiple  
158 traits. The simulation study showed that both components of the pleiotropy score were well-  
159 powered to detect horizontal pleiotropy (**Figure 4**), and that the LD correction dramatically  
160 reduces the dependence of the pleiotropy score on LD (**Supplementary Figure 1**). Under the  
161 null hypothesis of no added horizontal pleiotropy, the false positive rate was well controlled for

162 both scores when there was low heritability or few causal variants. However, when there are  
163 many causal variants and high per-variant heritability, the LD-corrected pleiotropy score ( $P_m^{LD}$   
164 and  $P_n^{LD}$ ) detects a large excess of pleiotropic variants, due to serendipitous overlap between  
165 causal variants without explicitly induced pleiotropy. The LD/polygenicity-corrected empirical  $P$ -  
166 value ( $P_m^P$  and  $P_n^P$ ) does not detect this serendipitous pleiotropy at the same high rate.

167 In the presence of added horizontal pleiotropy, our approach was powered to detect pleiotropy  
168 with per-variant heritability  $h^2$  as small as 0.002 if there are no non-pleiotropic causal variants.  
169 In the presence of both pleiotropic and non-pleiotropic causal variants, detecting pleiotropy was  
170 more difficult, but our approach still had appreciable power to detect pleiotropic variants, which  
171 increased with increasing per-variant heritability and decreased with increasing numbers of non-  
172 pleiotropic causal variants. Adding the correction for polygenic architecture ( $P_m^P$  and  $P_n^P$ )  
173 reduced this power only slightly. The power of our method was not substantially reduced by  
174 increasing the number of traits affected by pleiotropic variants (**Supplementary Figure 2**) or by  
175 adding a realistic correlation structure between the traits (**Supplementary Figure 3**).

## 176 **Genome-Wide Pleiotropy Study (GWPS) reveals pervasive** 177 **pleiotropy**

178 To apply our method to real human association data, we used GWAS association statistics for  
179 372 heritable medical traits measured in 337,119 individuals from the UK Biobank (17–19). We  
180 successfully computed our two-component pleiotropy score for 767,057 variants genome-wide  
181 and conducted a genome-wide pleiotropy study (GWPS), by analogy to a standard GWAS  
182 (**Figure 3; Methods**). **Supplementary Figure 4** shows the resulting quantile-quantile plots (Q-Q  
183 plots). We observed significant inflation for both the LD-corrected magnitude score  $P_m^{LD}$  and  
184 number of traits score  $P_n^{LD}$  (Mann-Whitney U test  $P < 10^{-300}$  for both). Furthermore, we



185 observed across both scores that horizontal pleiotropy was widely distributed across the  
186 genome, rather than being localized to a few specific loci (**Supplementary Figure 5**). Testing  
187 an alternative strategy for computing the phenotype-correlation matrix using all SNVs produced  
188 comparable results (Pearson  $r = 0.995$  and  $0.964$  for  $P_m^{LD}$  and  $P_n^{LD}$  respectively) to our strategy  
189 of using a pruned set of SNVs to account for LD ( $r^2 < 0.1$ ) (**Supplementary Figure 6**).

## 190 **Pleiotropy is driven by polygenicity**

191 We applied the permutation-based empirical  $P$ -value calculation (Polygenicity/LD-corrected  
192 pleiotropy score:  $P_m^P$  and  $P_n^P$ ) to correct for the known polygenic architecture of traits and test  
193 whether any loci are pleiotropic to a greater extent than would be expected due to polygenicity.  
194 **Supplementary Figures 7 and 8** show the resulting Q-Q plots and Manhattan plots. In contrast  
195 to the results from the LD-corrected pleiotropy score ( $P_m^{LD}$  and  $P_n^{LD}$ ), we do not find pleiotropy  
196 significantly in excess of what would be expected from the known polygenic architecture of  
197 traits: there are dramatically fewer loci with genome-wide significant levels of pleiotropy after  
198 correcting for polygenic architecture, and the genome-wide distribution of pleiotropy score  
199 shows less pleiotropy than expected (Mann-Whitney U test  $P < 10^{-300}$  for both  $P_m^P$  and  $P_n^P$ ).

200 As an additional test of whether the pleiotropy we observe is driven by polygenicity, we  
201 calculated the polygenicity of the same 372 heritable traits from the UK Biobank. We measured  
202 polygenicity using a version of the genomic inflation factor corrected using LD score  $\lambda_{GC}^c$  (20).  
203 We then stratified these traits by  $\lambda_{GC}^c$  after controlling for heritability (**Methods**), and calculated  
204 the two-component LD-corrected pleiotropy score [ $P_m^{LD}$  and  $P_n^{LD}$ ] and  $P$ -values for each  
205 component independently for every variant in the genome using each of these bins of traits. We  
206 observed that both scores are highly dependent on polygenicity, with the lowest-polygenicity  
207 bins in each heritability class showing very little inflation. (**Figure 5; Supplementary Table 1**).

208 Taken together, these results suggest that extreme polygenicity drives horizontal pleiotropy, and  
209 that this has an extremely large effect on the genetic architecture of human phenotypes.

## 210 **Genome-wide distribution of pleiotropy score gives insight into** 211 **genetic architecture**

212 In addition to observing genome-wide inflation of the pleiotropy score, we can also gain insight  
213 from the distribution of the pleiotropy score on a more granular level.

214 **Figure 6a** shows the distribution of pleiotropy score for independent SNVs (LD pruned to a  
215 threshold of  $r^2 < 0.1$ ) compared to the expectation under the null hypothesis of no pleiotropic  
216 effect. We observe a large excess in the number of traits score  $P_n^{LD}$ , and a smaller but still highly  
217 significant excess in total magnitude of pleiotropic effect  $P_m^{LD}$ . This excess comes in part from a  
218 long tail of highly pleiotropic loci that pass the threshold of genome-wide significance (dashed  
219 line in **Figure 6a**), but is primarily driven by weak pleiotropy among loci that do not reach  
220 genome-wide significance.

## 221 **Pleiotropy score is correlated with molecular and biological** 222 **function**

223 To further investigate the properties of pleiotropic variants, we examined the effects of various  
224 functional and biochemical annotations on our LD-corrected pleiotropy score ( $P_m^{LD}$  and  $P_n^{LD}$ )  
225 (**Table 1; Methods**). Using annotations from Ensembl Variant Effect Predictor (21), we  
226 observed that both components of the pleiotropy score are higher on average in transcribed  
227 regions (coding and UTR) than in intergenic noncoding regions. This result was confirmed and  
228 expanded by annotations from Roadmap Epigenomics (22), which showed that regions whose  
229 chromatin configurations were associated with actively transcribed regions, promoters,  
230 enhancers, and transcription factor binding sites had significantly higher levels of both  
231 components of the pleiotropy score, while heterochromatin and quiescent chromatin states had

232 significantly lower levels. Investigating individual histone marks, we found that both the  
233 repressive histone mark H3K27me3 and the activating histone mark H3K27ac were associated  
234 with elevated levels of pleiotropy, although the activating mark H3K27ac had a larger effect.  
235 This may indicate that being under active regulation at all produces higher levels of pleiotropy,  
236 whether that regulation is repressive or activating.

237 We also used data from the Genotype-Tissue Expression (23) project to measure the  
238 connection between transcriptional effects and our pleiotropy score (**Table 1**). Consistent with  
239 the previous observation that functional regions had higher pleiotropy scores, we found that  
240 variants that were identified as *cis*-eQTLs for any gene in any tissue had higher pleiotropy  
241 scores on average. Within eQTLs, we also observed significant correlations between our  
242 pleiotropy score and the numbers of genes ( $P_m^{LD}: r = 0.036, P < 2.2 \times 10^{-16}; P_n^{LD}: r = 0.035, P <$   
243  $2.2 \times 10^{-16}$ ) and tissues ( $P_m^{LD}: r = 0.062, P < 2.2 \times 10^{-16}; P_n^{LD}: r = 0.059, P < 2.2 \times 10^{-16}$ ) where  
244 the variant was annotated as an eQTL, showing that our pleiotropy score is related to  
245 transcriptional measures of pleiotropy.

246 Finally, we found that variants that are eQTLs for genes whose orthologs are associated with  
247 multiple measurable phenotypes in mice or yeast have higher pleiotropy scores, demonstrating  
248 that our pleiotropy score is also related to pleiotropy in model organisms.

249 All these results are consistent when using the Polygenicity/LD-corrected pleiotropy score  
250 ( $P_m^P$  and  $P_n^P$ ), indicating that the association of pleiotropy with molecular and biological function is  
251 not exclusively driven by highly polygenic architecture (**Additional File 1**).

## 252 **Genome-wide pleiotropy study identifies novel biological loci**

253 By analogy to standard GWAS, our GWPS methodology can identify individual variants that  
254 have a genome-wide significant level of horizontal pleiotropy. Using the LD-corrected magnitude

255 score  $P_m^{LD}$ , we identified 74,335 variants in 8,093 independent loci with a genome-wide  
256 significant level of horizontal pleiotropy, while using the LD-corrected number of traits score  
257  $P_n^{LD}$  identified 18,393 variants in 2,859 independent loci with a genome-wide significant level of  
258 horizontal pleiotropy, all of which are also identified by the LD-corrected magnitude score  $P_m^{LD}$   
259 **(Methods, Supplementary Table 2)**. Applying the same analysis to the Polygenicity/LD-  
260 corrected pleiotropy score, using the Polygenicity/LD-corrected magnitude score  $P_m^P$  identified  
261 no genome-wide significant loci, but using the Polygenicity/LD-corrected number of traits score  
262  $P_n^P$  identified 2,674 variants in 432 loci. Strikingly, a majority of loci significant in  $P_n^{LD}$  (1,519 of  
263 2,859) or  $P_n^P$  (294 of 432), along with a sizeable minority of loci significant in  $P_m^{LD}$  (2,934 of  
264 8,093), have no entry in the NHGRI-EBI GWAS catalog, meaning that they have never been  
265 reported as an associated locus in any published GWAS. These loci represent an under-  
266 recognized class of genetic variation that has multiple weak to intermediate effects that are  
267 collectively significant, but no specific strong effect on any one particular trait. Functional  
268 enrichment analysis on genes near these genome-wide significant loci implicates a wide range  
269 of biological functions, including cell adhesion, post-translational modification of proteins,  
270 cytoskeleton, transcription factors, and intracellular signaling cascades **(Additional File 2)**. Loci  
271 significant in  $P_n^P$  show a more focused subset of functions, with a greater role for nuclear  
272 proteins regulating transcription and chromatin state, suggesting that these are the functions  
273 that exhibit horizontal pleiotropy beyond the baseline level induced by polygenicity. The role of  
274 these novel loci and these biological processes in human genetics and biology may be a fruitful  
275 area for future study, with the potential for biological discovery.

## 276 **Pleiotropic loci replicate in independent GWAS datasets**

277 As replication datasets, we used two additional sources of GWAS summary statistics to  
278 calculate our LD-corrected pleiotropy score ( $P_m^{LD}$  and  $P_n^{LD}$ ): previously published GWASs and

279 meta-analyses for 73 human complex traits and diseases, which we collected and curated  
280 manually from the literature (**Methods, Supplementary Table 3**) (24); and a previously  
281 published study of 430 blood metabolites measured in 7,824 European adults (25). For all  
282 variants covered by the UK Biobank, we were able to compute our pleiotropy score  
283 independently using these two datasets (**Figure 7**). In the traits and diseases dataset, we  
284 observed that 57% of  $P_m^{LD}$  loci and 38% of  $P_n^{LD}$  loci replicated, while in the blood metabolites  
285 dataset, we observed that 17% of  $P_m^{LD}$  loci and 12% of  $P_n^{LD}$  loci replicated, compared to 5% of  
286  $P_m^{LD}$  loci and 6% of  $P_n^{LD}$  loci expected by chance according to a permutation-based null model.  
287 This high level of replication using independent sets of GWAS summary statistics suggests that  
288 our pleiotropy score is capturing an underlying biological property, rather than an artifact of the  
289 UK Biobank study.

## 290 **Pleiotropy is correlated with specific complex traits and diseases**

291 To characterize the phenotypic associations of these loci, we used our replication dataset of  
292 published GWAS summary statistics for 73 human quantitative traits and diseases, plus nine  
293 additional traits we excluded from our replication dataset for a total of 82 (**Methods**). We are not  
294 able to compute directly the degree of pleiotropy exhibited by these traits, since our definition of  
295 horizontal pleiotropy applies only to individual variants and does not apply to traits. However, we  
296 can identify traits whose GWAS variant associations are correlated to our pleiotropy score,  
297 which in some sense represents the traits that contribute most to our signal of pervasive  
298 horizontal pleiotropy. **Figure 6c** shows the correlations between our LD-corrected pleiotropy  
299 score ( $P_m^{LD}$  and  $P_n^{LD}$ ) and the association statistics for these 82 traits and diseases. The most  
300 strongly correlated traits were anthropometric traits like body mass index, waist and hip  
301 circumference, and height; certain blood lipid levels, including total cholesterol and triglycerides;  
302 and schizophrenia. These are all known to be highly polygenic and heterogeneous traits. The  
303 least correlated traits include several measurements of insulin sensitivity and glucose response,

304 such as the insulin sensitivity index (ISI), certain features of brain morphology, and the  
305 inflammatory biomarker lipoprotein(a). This may be partly due to low sample size of the  
306 corresponding GWASs. However, these correlations do not appear to be driven exclusively by  
307 sample size: in cases where multiple GWASs for the same trait have been performed on  
308 subsamples of the population (for example, males only, female only, and combined), the sample  
309 size only marginally affects the correlation (**Supplementary Table 4**). Another contributing  
310 factor may be heritability: height, in particular, is among the most heritable traits we examined,  
311 while ISI and the brain morphology features are among the least.

## 312 Discussion

313 We have presented a framework for scoring horizontal pleiotropy across human genetic  
314 variation. In contrast to previous analyses, our framework explicitly distinguishes between  
315 horizontal pleiotropy and vertical pleiotropy or biological causation. After applying both  
316 components of our pleiotropy score to 372 heritable medical traits from the UK Biobank, we  
317 made the following observations: 1) horizontal pleiotropy is pervasive and widely distributed  
318 across the genome; 2)) horizontal pleiotropy is driven by extreme polygenicity of traits; 3)  
319 horizontal pleiotropy is significantly enriched in actively transcribed regions and active regulatory  
320 regions, and is correlated with the number of genes and tissues for which the variant is an  
321 eQTL; 4) there are thousands of loci that exhibit extreme levels of horizontal pleiotropy, a  
322 majority of which have no previously reported associations; and 5) pleiotropic loci are enriched  
323 in specific complex traits including body mass index, height, and schizophrenia. These findings  
324 are largely consistent between the magnitude of pleiotropy score  $P_m$  and the number of traits  
325 score  $P_n$ , although we note some differences where some variants are primarily associated with  
326  $P_m^{LD}$  but not  $P_n^{LD}$ . This indicates that these signals are driven by loci that both influence a large  
327 number of traits and have relatively large combined effects, and secondarily by loci that have

328 large combined effects but only influence a handful of traits each, with minimal contribution from  
329 loci that influence a large number of traits but have small combined effects. Conversely, after  
330 applying the correction for polygenicity, we only observe variants that are significant for  $P_n^P$ , but  
331 not for  $P_m^P$ . This indicates that, while there do exist horizontal pleiotropic master control loci that  
332 affect more traits than we would expect from the random overlap of multiple highly polygenic  
333 traits, the overall effect of these loci is not noticeably larger than we would expect.

334 This analysis is enabled by the technique of whitening trait associations to remove correlations  
335 between traits. This lets us count pleiotropic effects in a more objective and systematic way, as  
336 opposed to manually selecting putatively independent traits to count, or manually grouping traits  
337 into independent blocks. However, it does come with three major limitations compared to these  
338 approaches. First, it is somewhat more difficult to tell which specific traits are driving a signal of  
339 pleiotropy at a particular locus. Our whitened traits are combinations of real observed traits, and  
340 do not necessarily correspond to any specific biological traits of interest. However, it is relatively  
341 easy to inspect the input GWAS summary statistics for a particular variant of interest to see  
342 which traits it is associated with. Furthermore, since pleiotropic loci are by definition associated  
343 with a large cross-section of traits, this kind of inspection is not likely to be very informative  
344 about specific traits. Second, the whitening procedure has the counterintuitive property that a  
345 variant that has a narrow effect on a single trait without also affecting correlated traits can  
346 appear to be highly pleiotropic. For example, if a variant had a strong risk-increasing effect on  
347 coronary artery disease (CAD), but no effect on any of the known upstream risk factors of CAD  
348 (such as blood lipid levels or adiposity) or any of the known downstream consequences of CAD  
349 (such as inflammatory biomarkers or increased mortality), such a variant would appear as highly  
350 pleiotropic in our analysis. Our analysis would interpret the variant as increasing the risk of CAD  
351 while suppressing these upstream and downstream factors. We believe this treatment is  
352 appropriate, however counterintuitive. Regardless, these kinds of isolated effects are fairly rare:

353 in our dataset of 372 heritable traits from UK Biobank, only 6% of variants (42,684 of 767,057)  
354 reach genome-wide significance for only a single trait. Indeed, it is unlikely by definition that a  
355 variant is associated with only one trait from a set of correlated traits, since we compute our  
356 correlations from observed association statistics. Third, we assume all genetic effects are  
357 additive and independent, and we do not model epistasis or other more complex genetic  
358 architectures.

359 Our findings are in keeping with several recent studies that have found abundant pleiotropy in  
360 the genome (26,27,8,2,9). Our pleiotropy score goes a step further than many of these studies  
361 by explicitly removing vertical pleiotropy between traits, which are indicative of fundamental  
362 biological relationships between traits (8,24,28). Furthermore, the current study has evaluated  
363 horizontal pleiotropy in human genetic variation genome-wide, whereas previous studies have  
364 focused on only a small subset of disease-associated variants identified from GWAS. Our  
365 results therefore suggest that there is substantial complexity and heterogeneity not only in  
366 causal relationships between human traits, but also in the genetic architecture of individual  
367 traits.

368 Our findings have several important implications for the field of human genetics. First, our  
369 observation of ubiquitous horizontal pleiotropy is problematic for Mendelian Randomization  
370 (MR) methods, which assumes horizontal pleiotropy to be absent. Recent developments in the  
371 field of MR include methods that account for horizontal pleiotropy explicitly (24,28,29); our  
372 results reinforce the importance of these methods. The presence of widespread horizontal  
373 pleiotropy suggests that single-instrument methods that independently account for every variant,  
374 each of which presumably has pleiotropic effects on many different distinct traits, should be  
375 considered in addition to multi-instrument methods for MR, which collapse many variants into a  
376 single polygenic score for analysis, and therefore treat all variants equivalently.



377 Second, our results appear to support the “network pleiotropy” hypothesis of Boyle, Li, and  
378 Pritchard (16), which proposes widespread pleiotropy driven by small perturbations of densely  
379 connected functional networks, where any perturbation in a relevant cell type will have at least a  
380 small effect on all phenotypes affected by that cell type. A subsequent paper detailed a more  
381 specific mechanism, where causal effects are driven by many biological components that are  
382 only indirectly related to the phenotype itself (30). Many of the functional enrichments we  
383 observe, including transcription factors, cytoskeleton, and intracellular signaling cascades,  
384 represent components that can plausibly influence a wide variety of cell types and processes,  
385 providing evidence for this model over one where a specific biological component is largely  
386 responsible for pleiotropy. The fact that the magnitude of pleiotropy score  $P_m$  and the number of  
387 traits score  $P_n$  give largely consistent results also supports this model, where a larger biological  
388 effect in a given tissue will perturb a greater number of phenotypes relevant to that tissue,  
389 although we note that some variants have high magnitude of pleiotropy score  $P_m$  and low  
390 number of traits score  $P_n$ , which may represent a small class of variants that has large biological  
391 effects without perturbing a large number of phenotypes.

392 While our results largely support this network pleiotropy hypothesis, we have also demonstrated  
393 an alternate view of horizontal pleiotropy in the context of highly polygenic causation. In our  
394 simulations, introducing extreme polygenicity at the levels suggested by these papers inherently  
395 results in high levels of horizontal pleiotropy detectable by our score, independent of any  
396 assumptions about the mechanism of pleiotropy or of polygenicity. Indeed, our null hypothesis  
397 of no horizontal pleiotropy, that 5% of the genome is independently causal to each trait with  $P <$   
398 0.05, is trivially rejected when a single trait is influenced by an unexpectedly large fraction of the  
399 genome. This means that, on some level, widespread horizontal pleiotropy in human genetic  
400 variation is simply a logical consequence of widespread polygenicity of human traits, regardless  
401 of the specific mechanism of either. In simple terms, the more loci are associated with each trait,

402 the more chances there are for associations with multiple traits to overlap. Supporting this  
403 result, we find that controlling for the polygenic architecture of the input traits significantly  
404 attenuates our signal of pleiotropy, as does restricting to oligogenic traits. It may be the case  
405 that horizontal pleiotropy is only truly widespread among the most complex and polygenic  
406 subset of human traits.

## 407 **Conclusions**

408 In this study, we have presented a quantitative score for horizontal pleiotropy in human genome  
409 variation. Using this score, we have identified a genome-wide trend of highly inflated levels of  
410 horizontal pleiotropy, an underappreciated relationship between horizontal pleiotropy with  
411 polygenicity and functional biology, and a large number of specific novel loci with high levels of  
412 horizontal pleiotropy. We expect further investigations using this score to yield deep insights into  
413 the genetic architecture of human traits and to uncover important novel biology.

## 414 **Methods**

415 We developed a statistical method to measure horizontal pleiotropy using a two-component  
416 pleiotropy score. For a given variant, we measured 1) the total magnitude of pleiotropic effect  
417 the variant has and 2) the number of whitened traits affected by the variant.

### 418 **Z-scores decorrelation strategy**

419 Observable traits and diseases can be highly correlated, which can lead to inflation of our  
420 pleiotropy score if the correlation is not properly accounted for. Therefore, we developed an  
421 efficient strategy to remove this correlation and obtain decorrelated traits. Let  $Z^{raw}$  denote the  
422 matrix of raw Z-scores, with variants in columns and traits in rows, and  $\Sigma$  denote the

423 corresponding correlation matrix between the Z-scores. Under the null hypothesis of no  
424 horizontal pleiotropy, Z-scores for each trait are assumed to follow a Gaussian distribution  
425  $N(0,1)$ , and the columns of  $Z^{raw}$  collectively follow a multivariate Gaussian distribution  $N(0, \Sigma)$ .  
426 Our goal is to eliminate the extra-diagonal terms of the correlation matrix  $\Sigma$ . To achieve this, we  
427 use a Mahalanobis whitening transformation on the matrix  $Z^{raw}$  to obtain a whitened Z-score  
428 matrix  $Z$ . The procedure to obtain  $Z$  can be formally expressed as:

$$Z = \Sigma^{-\frac{1}{2}} Z^{raw}$$

429 Under the null hypothesis of no horizontal pleiotropy, we expect  $Z$  to follow a multivariate  
430 Gaussian distribution  $N(0, Id_l)$ , where  $Id_l$  is the identity matrix of size  $l$ ,  $l$  being the number of  
431 traits.

432 In reality, the true correlation matrix  $\Sigma$  is unknown, and we must use an estimated correlation  
433 matrix  $\hat{\Sigma}$  obtained by measuring the genome-wide correlation between actual Z-scores. We  
434 tested two approaches to obtain  $\hat{\Sigma}$ , either using all genotyped variants genome-wide or using a  
435 subset of variants pruned to  $r^2 < 0.1$  in the 1000 Genomes European population to account for  
436 the effects of linkage disequilibrium (LD). Both approaches produced similar results (See  
437 **Supplementary Figure 6**). In all subsequent analysis, we used covariance matrices estimated  
438 from pruned variants.

## 439 **Computation of the pleiotropy score**

440 We computed two different scores to capture both the magnitude and number of traits of  
441 pleiotropy. First, we quantify the total pleiotropic magnitude of effect a variant using the  
442 magnitude pleiotropy score  $P_m$ :

$$P_m = \frac{100}{l} \sqrt{\sum_1^l z_i^2}$$

443 where  $z_i$  is the whitened Z-score for trait  $i$  for a given variant. Second, we quantify the number  
444 of whitened traits affected by a variant using the number of pleiotropic traits score  $P_n$ :

$$P_n = \frac{100}{l} \sum_1^l H(z_i - 2)$$

445 where  $z_i$  is the whitened Z-score for trait  $i$  for the tested variant and  $H()$  is the Heaviside step  
446 function which equals 1 if  $|z_i| > 2$  and 0 otherwise. 2 represents a standard value of the Z-score  
447 which represents the normal threshold for nominal significance ( $P < 0.05$ ).

#### 448 **LD-corrected pleiotropy score**

449 Similarly to LD score regression, each component of the pleiotropy score was regressed on the  
450 LD scores for all variants. Then, we regressed out the effect of LD on each component of the  
451 pleiotropy score independently to obtain an LD-corrected pleiotropy score. The LD-corrected  
452 pleiotropy score components  $P_m^{LD}$  and  $P_n^{LD}$  are given by:

$$P_m^{LD} = P_m - \beta_m l$$

$$P_n^{LD} = P_n - \beta_n l$$

453 where  $l$  is the LD score of the variant site, and  $\beta_m$  and  $\beta_n$  are the regression coefficients for LD  
454 score on  $P_m$  and  $P_n$ , respectively.

#### 455 **Computation of theoretical $P$ -values for the pleiotropy score**

456 Based on the observation that  $Z$  follows a multivariate standard Gaussian distribution  $N(0, Id_l)$   
457 under the null hypothesis of no pleiotropy,  $P$ -values can easily be computed for  $P_m$  and  $P_n$ .

458 Under the null hypothesis, the square of  $P_m$  (or  $P_m^{LD}$ ) follows a chi-square distribution  $\chi^2(l)$   
459 where  $l$  is the total number of traits. Likewise,  $P_n$  (or  $P_n^{LD}$ ) follows a binomial distribution  $B(l, p)$   
460 where  $l$  is the total number of traits and  $p$  the probability to get a Z-score greater than 2 under  
461 the standard Gaussian distribution ( $P \approx 0.045$ ).

## 462 **Computation of empirical (polygenicity/LD-corrected) $P$ -values for** 463 **the pleiotropy score**

464 To correct for the known polygenic architecture of traits in addition to LD, we additionally  
465 computed empirical permutation-based  $P$ -values for both  $P_m^{LD}$  and  $P_n^{LD}$ . We performed 25  
466 random permutations of the input Z-scores for each observable trait, producing millions of  
467 permuted variants. We calculated  $P_m$  and  $P_n$  for each of these permuted variants, and then rank  
468 ordered the resulting scores. The empirical  $P$ -value corresponding to a value of  $P_m^{LD}$  or  $P_n^{LD}$  is  
469 given by the fraction of permuted variants with higher scores than the given value. We  
470 converted these  $P$ -values into polygenicity/LD-corrected  $P_m^P$  and  $P_n^P$  scores by converting each  
471  $P$ -value into the score it would correspond to under the expected (theoretical) distributions  
472 described above.

## 473 **Simulation framework**

474 We simulated a realistic matrix of Z-scores  $Z$  with 100 traits and 800,000 genotyped variants.  
475 For non-causal variants, Z-scores for each trait were drawn from an independent Gaussian  
476 distribution  $N(0,1)$ . A subset of variants was designated as causal, either pleiotropically or non-  
477 pleiotropically. For these causal variants, Z-scores were drawn from a different Gaussian  
478 distribution  $N(0, h^2)$ , where  $h^2$  is a parameter representing the per-variant heritability of each  
479 trait. Non-pleiotropic variants were selected independently for each trait, while pleiotropic  
480 variants were selected globally and each forced to be causal for a specified number of traits  $v$ .

481 Simulations were run for all combinations of the following parameters: 1) correlation structure:  
482 absent or present; 2) proportion of pleiotropic causal variants: 0.1% (800/800,000 variants) or  
483 1% (8,000/800,000 variants); 3) proportion of non-pleiotropic causal variants: 0 (0/800,000  
484 variants), 0.1% (800/800,000 variants), or 1% (8,000/800,000 variants); 4) number of traits  
485 involved in horizontal pleiotropy  $\nu$ : 10 or 20; 5) per-variant heritability of traits  $h^2$ : 0.0002, 0.002,  
486 0.02, or 0.2. Each scenario was replicated 10,000 times.

## 487 **Collection of genome-wide association (GWA) summary statistics** 488 **datasets**

489 First, we retrieved GWA publicly available summary statistics from 545 continuous traits in  
490 361,194 samples from the UK Biobank (17), and 1,403 binary traits from the same dataset  
491 calculated using SAIGE (18,19). We used LD score regression to calculate heritability for each  
492 trait, using the liability scale for binary traits, and restricted the sample to only traits with a  
493 significant  $P$ -value for nonzero heritability after Bonferroni correction. For every pair of traits with  
494 correlation coefficient between Z-scores  $r^2 > 0.8$ , we additionally removed the member of the  
495 pair with lower heritability. This left a total of 372 traits.

496 Second, we retrieved publicly available genome-wide association (GWA) summary statistics  
497 data for 82 complex traits and diseases (31–66) (**Table S9**). For each dataset, we retrieved the  
498 appropriate variant annotation (build, rsid, chromosome, position, reference and alternate  
499 alleles) and summary statistics (effect size, standard errors,  $P$ -values and sample size of the  
500 study). All variant coordinates (chr, pos) were lifted over to hg19 using the UCSC Genome  
501 Browser LiftOver Tool and aligned to the reference and alternate alleles retrieved from the  
502 Ensembl variation database. After performing the same pruning of highly correlated phenotypes,  
503 we were left with 73 traits and diseases.

504 Third, we retrieved GWA summary statistics datasets from a GWAS of 453 blood metabolites in  
505 7,824 individuals (67). After performing the same pruning of highly correlated phenotypes, we  
506 were left with 430 metabolites.

## 507 **Genome-wide pleiotropy study (GWPS)**

508 Using the two components of the pleiotropy score, we can run a genome-wide pleiotropy study  
509 (GWPS) which consists of computing two *P-values* for each component of the score ( $P_m^{LD}$  and  
510  $P_n^{LD}$ ) and for all variants genome-wide. We computed the pleiotropy score separately for each of  
511 the three datasets described above (372 UK Biobank phenotypes, 73 traits and diseases, and  
512 430 blood metabolites). Additionally, we computed the pleiotropy score on a subset of 372 traits  
513 with genome-wide significant heritability as calculated by LD Score Regression (20) (univariate  
514 heritability significant after Bonferroni correction). The 372 UK Biobank heritable traits were  
515 used for discovery, and the 73 traits and diseases and 430 blood metabolites datasets were  
516 used for replication. There was a total of 768,756 variants genotyped across all three datasets.

## 517 **Study of polygenicity on horizontal pleiotropy**

518 To study the effect of polygenicity on horizontal pleiotropy, we first estimated the liability-scale  
519 heritability of all 372 traits in our UK Biobank dataset using LD score regression, and stratified  
520 all traits into four equally-sized classes of heritability, in order to control for the effect of high  
521 heritability separate from the effect of high polygenicity. Next, we estimated the polygenicity of  
522 the 372 traits using a corrected version of the genomic inflation factor  $\lambda_{CG}^c$  (20). The intercept of  
523 LD score regression minus one is an estimator of the mean contribution of confounding bias to  
524 the inflation in the test statistics. Therefore, we computed a corrected version of the genomic  
525 inflation factor by subtracting the quantity (intercept of LD score regression - 1) from  $\lambda_{GC}$ . The  
526 372 phenotypes were then ranked according to  $\lambda_{CG}^c$  within each heritability class, and grouped  
527 into 5 equal-sized bins of about 20 phenotypes each. We then recomputed the LD-corrected

528 pleiotropy score components ( $P_m^{LD}$  and  $P_n^{LD}$ ) for the subset of phenotypes in each bin. The  
529 inflation of the pleiotropy score was measured per bin to represent pleiotropy score inflation as a  
530 function of polygenicity.

## 531 **Characterization of the pleiotropic variants**

532 We performed various enrichment analyses for the pleiotropy score to characterize the  
533 pleiotropic variants using a variety of annotations that could be a direct consequence of  
534 horizontal pleiotropy. Each analysis uses the principle of assigning each variant an annotation  
535 category and selecting one category as the reference category. Then, for each category, we  
536 selected a set of variants from the corresponding reference category with minor allele  
537 frequencies matched to those in the query category, and performed a Student's t-test to test  
538 whether the average LD-corrected pleiotropy score ( $P_m^{LD}$  and  $P_n^{LD}$ ) of the variants in each given  
539 category is different from the average LD-corrected pleiotropy score of the selected reference  
540 variants.

541 First, we used Ensembl Variant Effect Predictor (21) to classify each variant as noncoding, UTR,  
542 nonsynonymous, or coding synonymous, treating noncoding as the reference class. These were  
543 complemented by annotations from Roadmap Epigenomics (22). We used the 25-state  
544 chromatin state model published by Roadmap Epigenomics to assign each variant 25 scores  
545 from 0 to 127, where each score represents the number of epigenomes for which that site is  
546 assigned to the corresponding category. We did the same for two specific chromatin marks: the  
547 activating mark H3K27ac and the repressive mark H3K27me3. For these annotations, we used  
548 a combination of all other categories as a reference set. In other words, the reference set for  
549 each category is all variants that are not in that category.

550 In addition to these molecular annotations, we used expression-related annotations from the  
551 Genotype-Tissue Expression project (23). For each variant, we retrieved the number of genes



552 for which the variant is referenced as a *cis* eQTL (expression quantitative trait loci) in any tissue  
553 (eGenes), and the number of tissues where the variant is annotated as a *cis* eQTL for any gene  
554 (eTissues). We divided variants into bins by number of eGenes (below 10, between 10 and 15,  
555 between 15 and 20, and over 20) and eTissues (below 30, between 30 and 35, between 35 and  
556 40, and above 40). The reference set used for these analyses were variants that are not  
557 annotated as eQTLs in any gene or tissue.

558 Finally, we used model organism phenotypes measured by the International Mouse  
559 Phenotyping Consortium (IMPC) (68) and the Saccharomyces Cerevisiae Morphological  
560 Database (SCMD) (69). To map ortholog genes from IMPC and SCMD to human variants, we  
561 used orthology annotations of gene orthologs, and eQTLs from GTEx. Thus, variants annotated  
562 as associated with a mouse or yeast phenotype are those that are annotated as *cis* eQTLs in  
563 any tissue for a gene whose ortholog in mouse or yeast is associated with that phenotype. The  
564 reference set for this analysis was variants annotated as *cis* eQTLs for genes that are not  
565 associated with mouse or yeast phenotypes.

## 566 **Genome-wide significant pleiotropy loci**

567 To detect loci with a genome-wide significant pleiotropy, we used the LD-corrected two-  
568 component pleiotropy score ( $P_m^{LD}$  and  $P_n^{LD}$ ) computed on the dataset of 372 heritable traits from  
569 UK Biobank described above. We used LD clumping as implemented in PLINK to cluster linked  
570 variants, with an  $r^2$  threshold of 0.1, a distance threshold of 100 kb, and *P-value* thresholds of  $5$   
571  $\times 10^{-8}$  for genome-wide significance and 0.05 for nominal significance. The resulting loci were  
572 assigned to genes using 1) localization of variants within a gene, as annotated by Ensembl  
573 Variant Effect predictor, and 2) annotation as a *cis* eQTL in any tissue, as annotated by GTEx.  
574 We submitted the resulting list of genome-wide significant genes to DAVID for enrichment  
575 analysis (70–72).

## 576 **Permutation-based null model for replication analysis**

577 In general, we should expect only 5% of loci to replicate by chance in each replication dataset;  
578 however, it is possible that this number might increase because of polygenicity in the underlying  
579 GWAS statistics and the resulting inflation in our pleiotropy score, which may cause  
580 substantially more than 5% of the genome to be assigned  $P < 0.05$ . To correct for this, we  
581 performed random permutations of the whitened Z-scores independently for each trait and used  
582 these permuted Z-scores to compute our LD-corrected pleiotropy score components ( $P_m^{LD}$  and  
583  $P_n^{LD}$ ). This generates a null expectation that preserves the polygenicity and inflation within each  
584 dataset. For both datasets, our null model expected that 5% of loci for  $P_m^{LD}$  loci and 6% of loci for  
585  $P_n^{LD}$  should replicate. The fraction that replicated in the actual data was substantially higher  
586 **(Figure 7)**.

587

## 588 **Ethics approval and consent to participate**

589 Not applicable.

## 590 **Consent for publication**

591 Not applicable.

## 592 **Availability of data and material**

593 An R package implementing this pleiotropy score method is available on GitHub at  
594 <https://github.com/rondolab/PleiotropyScore>. The dataset of summary statistics for the 372  
595 medical traits from the UK Biobank and the pleiotropy scores computed from these summary  
596 statistics are also available in the same GitHub project at  
597 <https://github.com/rondolab/PleiotropyScore/tree/master/data>. The summary statistics for 430  
598 blood metabolites are available from the original publication where this dataset was reported

599 (61), and the summary statistics for 73 human traits and diseases are available from the original  
600 publications where they were reported, as cited in **Supplementary Table 3**.

601

602

## 603 **Competing interests**

604 R.D has received research support from AstraZeneca and Goldfinch Bio.

## 605 **Funding**

606 R.D is supported by R35GM124836 from the National Institute of General Medical Sciences of  
607 the National Institutes of Health, R01HL139865 from the National Heart, Lung, Blood Institute of  
608 the National Institutes of Health and previously an American Heart Association Cardiovascular  
609 Genome-Phenome Discovery grant (15CVGPS27130014). D.M.J. is supported by  
610 T32HL00782 from the National Heart, Lung, and Blood Institute of the National Institutes of  
611 Health. The content is solely the responsibility of the authors and does not necessarily represent  
612 the official views of the National Institutes of Health.

## 613 **Authors' contributions**

614 D.M.J. and M.V. contributed to study conception, data analysis, interpretation of the results and  
615 drafting of the manuscript. R.D. contributed to study conception, interpretation of the results and  
616 critical revision of the manuscript.

## 617 **Acknowledgments**

618 We thank the various genome-wide association consortia as well as Dr. Benjamin Neale's and  
619 Dr. Seunggeun Lee's group for generously sharing genome-wide association summary statistics  
620 for phenome-wide association scan in UK biobank.

## 621 **References**

- 622 1. Zhan J, Arking DE, Bader JS. Discovering patterns of pleiotropy in genome-wide  
623 association studies. *bioRxiv*. 2018 Feb 28;273540.
- 624 2. Chesmore K, Bartlett J, Williams SM. The ubiquity of pleiotropy in human disease. *Hum*  
625 *Genet*. 2017 Nov 21;1–6.
- 626 3. Socrates A, Bond T, Karhunen V, Auvinen J, Rietveld C, Veijola J, et al. Polygenic risk  
627 scores applied to a single cohort reveal pleiotropy among hundreds of human phenotypes.  
628 *bioRxiv*. 2017 Oct 14;203257.
- 629 4. Solovieff N, Cotsapas C, Lee PH, Purcell SM, Smoller JW. Pleiotropy in complex traits:  
630 challenges and strategies. *Nat Rev Genet*. 2013 Jul;14(7):483–95.
- 631 5. Keightley PD, Hill WG. Variation maintained in quantitative traits with mutation–selection  
632 balance: pleiotropic side-effects on fitness traits. *Proc R Soc Lond B*. 1990 Nov  
633 22;242(1304):95–100.
- 634 6. Paaby AB, Rockman MV. The many faces of pleiotropy. *Trends in Genetics*. 2013 Feb  
635 1;29(2):66–73.
- 636 7. Tyler AL, Asselbergs FW, Williams SM, Moore JH. Shadows of complexity: what biological  
637 networks reveal about epistasis and pleiotropy. *BioEssays*. 2009 Feb 1;31(2):220–7.
- 638 8. Pickrell JK, Berisa T, Liu JZ, Ségurel L, Tung JY, Hinds DA. Detection and interpretation of  
639 shared genetic influences on 42 human traits. *Nat Genet*. 2016 Jul;48(7):709–17.
- 640 9. Kanai M, Akiyama M, Takahashi A, Matoba N, Momozawa Y, Ikeda M, et al. Genetic  
641 analysis of quantitative traits in the Japanese population links cell types to complex human  
642 diseases. *Nat Genet*. 2018 Mar;50(3):390–400.
- 643 10. Pasaniuc B, Price AL. Dissecting the genetics of complex traits using summary association  
644 statistics. *Nature Reviews Genetics*. 2017 Feb;18(2):117–27.
- 645 11. Do R, Willer CJ, Schmidt EM, Sengupta S, Gao C, Peloso GM, et al. Common variants  
646 associated with plasma triglycerides and risk for coronary artery disease. *Nat Genet*. 2013  
647 Nov;45(11):1345–52.
- 648 12. Ference BA, Yoo W, Alesh I, Mahajan N, Mirowska KK, Mewada A, et al. Effect of long-  
649 term exposure to lower low-density lipoprotein cholesterol beginning early in life on the risk

- 650 of coronary heart disease: a Mendelian randomization analysis. *J Am Coll Cardiol*. 2012  
651 Dec 25;60(25):2631–9.
- 652 13. Burgess S, Freitag DF, Khan H, Gorman DN, Thompson SG. Using multivariable  
653 Mendelian randomization to disentangle the causal effects of lipid fractions. *PLoS ONE*.  
654 2014;9(10):e108891.
- 655 14. Burgess S, Bowden J, Fall T, Ingelsson E, Thompson SG. Sensitivity Analyses for Robust  
656 Causal Inference from Mendelian Randomization Analyses with Multiple Genetic Variants.  
657 *Epidemiology*. 2017;28(1):30–42.
- 658 15. Pierce BL, Ahsan H, Vanderweele TJ. Power and instrument strength requirements for  
659 Mendelian randomization studies using multiple genetic variants. *Int J Epidemiol*. 2011  
660 Jun;40(3):740–52.
- 661 16. Boyle EA, Li YI, Pritchard JK. An Expanded View of Complex Traits: From Polygenic to  
662 Omnigenic. *Cell*. 2017 Jun 15;169(7):1177–86.
- 663 17. Abbott L, Bryant S, Churchhouse C, Ganna A, Howrigan D, Palmer D, et al. UK Biobank.  
664 [cited 2018 Aug 7]. Available from: <http://www.nealelab.is/uk-biobank>
- 665 18. Zhou W, Nielsen JB, Fritsche LG, Dey R, Gabrielsen ME, Wolford BN, et al. Efficiently  
666 controlling for case-control imbalance and sample relatedness in large-scale genetic  
667 association studies. *Nature Genetics*. 2018 Sep 1;50(9):1335–41.
- 668 19. Zhou W, Nielsen JB, Fritsche LG, Elvestad ME, Wolford BN, Lin M, et al. SAIGE [Internet].  
669 [cited 2018 Sep 20]. Available from: [https://github.com/weizhouUMICH/SAIGE#uk-](https://github.com/weizhouUMICH/SAIGE#uk-biobank-gwas-results)  
670 [biobank-gwas-results](https://github.com/weizhouUMICH/SAIGE#uk-biobank-gwas-results)
- 671 20. Bulik-Sullivan BK, Loh P-R, Finucane HK, Ripke S, Yang J, Consortium SWG of the PG, et  
672 al. LD Score regression distinguishes confounding from polygenicity in genome-wide  
673 association studies. *Nature Genetics*. 2015 Mar;47(3):291.
- 674 21. McLaren W, Gil L, Hunt SE, Riat HS, Ritchie GRS, Thormann A, et al. The Ensembl  
675 Variant Effect Predictor. *Genome Biology*. 2016 Jun 6;17(1):122.
- 676 22. Bernstein BE, Stamatoyannopoulos JA, Costello JF, Ren B, Milosavljevic A, Meissner A, et  
677 al. The NIH Roadmap Epigenomics Mapping Consortium. *Nature Biotechnology*. 2010 Oct  
678 13;28:1045.
- 679 23. GTEx Consortium, Laboratory, Data Analysis & Coordinating Center (LDACC)—Analysis  
680 Working Group, Statistical Methods groups—Analysis Working Group, Enhancing GTEx  
681 (eGTEx) groups, NIH Common Fund, NIH/NCI, et al. Genetic effects on gene expression  
682 across human tissues. *Nature*. 2017 Oct 11;550(7675):204–13.
- 683 24. Verbanck M, Chen C-Y, Neale B, Do R. Detection of widespread horizontal pleiotropy in  
684 causal relationships inferred from Mendelian randomization between complex traits and  
685 diseases. *Nature Genetics*. 2018 Apr 23;1.
- 686 25. Shin S-Y, Fauman EB, Petersen A-K, Krumsiek J, Santos R, Huang J, et al. An atlas of  
687 genetic influences on human blood metabolites. *Nat Genet*. 2014 Jun;46(6):543–50.

- 688 26. Wang Z, Liao B-Y, Zhang J. Genomic patterns of pleiotropy and the evolution of  
689 complexity. *PNAS*. 2010 Oct 19;107(42):18034–9.
- 690 27. Sivakumaran S, Agakov F, Theodoratou E, Prendergast JG, Zgaga L, Manolio T, et al.  
691 Abundant pleiotropy in human complex diseases and traits. *Am J Hum Genet*. 2011 Nov  
692 11;89(5):607–18.
- 693 28. Bowden J, Del Greco M F, Minelli C, Davey Smith G, Sheehan N, Thompson J. A  
694 framework for the investigation of pleiotropy in two-sample summary data Mendelian  
695 randomization. *Statist Med*. 2017 Jan 1;n/a-n/a.
- 696 29. Bowden J, Smith GD, Burgess S. Mendelian randomization with invalid instruments: effect  
697 estimation and bias detection through Egger regression. *Int J Epidemiol*. 2015 Apr  
698 1;44(2):512–25.
- 699 30. Liu X, Li YI, Pritchard JK. Trans effects on gene expression can drive omnigenic  
700 inheritance. *bioRxiv*. 2018 Jan 1;425108.
- 701 31. Prokopenko I, Poon W, Mägi R, Prasad B R, Salehi SA, Almgren P, et al. A central role for  
702 *GRB10* in regulation of islet function in man. *PLoS Genet*. 2014 Apr;10(4):e1004235.
- 703 32. Bradfield JP, Taal HR, Timpson NJ, Scherag A, Lecoeur C, Warrington NM, et al. A  
704 genome-wide association meta-analysis identifies new childhood obesity loci. *Nat Genet*.  
705 2012 May;44(5):526–31.
- 706 33. Major Depressive Disorder Working Group of the Psychiatric GWAS Consortium, Ripke S,  
707 Wray NR, Lewis CM, Hamilton SP, Weissman MM, et al. A mega-analysis of genome-wide  
708 association studies for major depressive disorder. *Mol Psychiatry*. 2013 Apr;18(4):497–  
709 511.
- 710 34. van der Valk RJP, Kreiner-Møller E, Kooijman MN, Guxens M, Stergiakouli E, Sääf A, et al.  
711 A novel common variant in *DCST2* is associated with length in early life and height in  
712 adulthood. *Hum Mol Genet*. 2015 Feb 15;24(4):1155–68.
- 713 35. Liu JZ, van Sommeren S, Huang H, Ng SC, Alberts R, Takahashi A, et al. Association  
714 analyses identify 38 susceptibility loci for inflammatory bowel disease and highlight shared  
715 genetic risk across populations. *Nat Genet*. 2015 Sep;47(9):979–86.
- 716 36. Schizophrenia Working Group of the Psychiatric Genomics Consortium. Biological insights  
717 from 108 schizophrenia-associated genetic loci. *Nature*. 2014 Jul 24;511(7510):421–7.
- 718 37. Hibar DP, Stein JL, Renteria ME, Arias-Vasquez A, Desrivieres S, Jahanshad N, et al.  
719 Common genetic variants influence human subcortical brain structures. *Nature*. 2015 Apr  
720 9;520(7546):224–9.
- 721 38. Taal HR, St Pourcain B, Thiering E, Das S, Mook-Kanamori DO, Warrington NM, et al.  
722 Common variants at 12q15 and 12q24 are associated with infant head circumference. *Nat*  
723 *Genet*. 2012 Apr 15;44(5):532–8.

- 724 39. Wood AR, Esko T, Yang J, Vedantam S, Pers TH, Gustafsson S, et al. Defining the role of  
725 common variation in the genomic and biological architecture of adult human height. *Nat*  
726 *Genet.* 2014 Nov;46(11):1173–86.
- 727 40. Global Lipids Genetics Consortium, Willer CJ, Schmidt EM, Sengupta S, Peloso GM,  
728 Gustafsson S, et al. Discovery and refinement of loci associated with lipid levels. *Nat*  
729 *Genet.* 2013 Nov;45(11):1274–83.
- 730 41. Pattaro C, Teumer A, Gorski M, Chu AY, Li M, Mijatovic V, et al. Genetic associations at  
731 53 loci highlight cell types and biological pathways relevant for kidney function. *Nat*  
732 *Commun.* 2016 Jan 21;7:10023.
- 733 42. Locke AE, Kahali B, Berndt SI, Justice AE, Pers TH, Day FR, et al. Genetic studies of body  
734 mass index yield new insights for obesity biology. *Nature.* 2015 Feb 12;518(7538):197–  
735 206.
- 736 43. International Consortium for Blood Pressure Genome-Wide Association Studies, Ehret GB,  
737 Munroe PB, Rice KM, Bochud M, Johnson AD, et al. Genetic variants in novel pathways  
738 influence blood pressure and cardiovascular disease risk. *Nature.* 2011 Sep  
739 11;478(7367):103–9.
- 740 44. Köttgen A, Albrecht E, Teumer A, Vitart V, Krumsiek J, Hundertmark C, et al. Genome-  
741 wide association analyses identify 18 new loci associated with serum urate concentrations.  
742 *Nat Genet.* 2013 Feb;45(2):145–54.
- 743 45. Felix JF, Bradfield JP, Monnereau C, van der Valk RJP, Stergiakouli E, Chesani A, et al.  
744 Genome-wide association analysis identifies three new susceptibility loci for childhood  
745 body mass index. *Hum Mol Genet.* 2016 Jan 15;25(2):389–403.
- 746 46. Cousminer DL, Berry DJ, Timpson NJ, Ang W, Thiering E, Byrne EM, et al. Genome-wide  
747 association and longitudinal analyses reveal genetic loci linking pubertal height growth,  
748 pubertal timing and childhood adiposity. *Hum Mol Genet.* 2013 Jul 1;22(13):2735–47.
- 749 47. Horikoshi M, Beaumont RN, Day FR, Warrington NM, Kooijman MN, Fernandez-Tajes J, et  
750 al. Genome-wide associations for birth weight and correlations with adult disease. *Nature.*  
751 2016 Oct 13;538(7624):248–52.
- 752 48. Okbay A, Beauchamp JP, Fontana MA, Lee JJ, Pers TH, Rietveld CA, et al. Genome-wide  
753 association study identifies 74 loci associated with educational attainment. *Nature.* 2016  
754 26;533(7604):539–42.
- 755 49. Okada Y, Wu D, Trynka G, Raj T, Terao C, Ikari K, et al. Genetics of rheumatoid arthritis  
756 contributes to biology and drug discovery. *Nature.* 2014 Feb 20;506(7488):376–81.
- 757 50. Cousminer DL, Stergiakouli E, Berry DJ, Ang W, Groen-Blokhuis MM, Körner A, et al.  
758 Genome-wide association study of sexual maturation in males and females highlights a  
759 role for body mass and menarche loci in male puberty. *Hum Mol Genet.* 2014 Aug  
760 15;23(16):4452–64.
- 761 51. Tobacco and Genetics Consortium. Genome-wide meta-analyses identify multiple loci  
762 associated with smoking behavior. *Nat Genet.* 2010 May;42(5):441–7.

- 763 52. Cross-Disorder Group of the Psychiatric Genomics Consortium. Identification of risk loci  
764 with shared effects on five major psychiatric disorders: a genome-wide analysis. *Lancet*.  
765 2013 Apr 20;381(9875):1371–9.
- 766 53. Scott RA, Lagou V, Welch RP, Wheeler E, Montasser ME, Luan J, et al. Large-scale  
767 association analyses identify new loci influencing glycemic traits and provide insight into  
768 the underlying biological pathways. *Nat Genet*. 2012 Sep;44(9):991–1005.
- 769 54. Manning AK, LaValley M, Liu C-T, Rice K, An P, Liu Y, et al. Meta-analysis of Gene-  
770 Environment interaction: joint estimation of SNP and SNP×Environment regression  
771 coefficients. *Genet Epidemiol*. 2011 Jan;35(1):11–8.
- 772 55. the CARDIoGRAMplusC4D Consortium. A comprehensive 1000 Genomes-based genome-  
773 wide association meta-analysis of coronary artery disease. *Nat Genet*. 2015  
774 Oct;47(10):1121–30.
- 775 56. Morris AP, Voight BF, Teslovich TM, Ferreira T, Segrè AV, Steinthorsdottir V, et al. Large-  
776 scale association analysis provides insights into the genetic architecture and  
777 pathophysiology of type 2 diabetes. *Nat Genet*. 2012 Sep;44(9):981–90.
- 778 57. Psychiatric GWAS Consortium Bipolar Disorder Working Group. Large-scale genome-wide  
779 association analysis of bipolar disorder identifies a new susceptibility locus near ODZ4. *Nat*  
780 *Genet*. 2011 Sep 18;43(10):977–83.
- 781 58. Stolk L, Perry JRB, Chasman DI, He C, Mangino M, Sulem P, et al. Meta-analyses identify  
782 13 loci associated with age at menopause and highlight DNA repair and immune  
783 pathways. *Nat Genet*. 2012 Jan 22;44(3):260–8.
- 784 59. Lambert JC, Ibrahim-Verbaas CA, Harold D, Naj AC, Sims R, Bellenguez C, et al. Meta-  
785 analysis of 74,046 individuals identifies 11 new susceptibility loci for Alzheimer’s disease.  
786 *Nat Genet*. 2013 Dec;45(12):1452–8.
- 787 60. Dehghan A, Dupuis J, Barbalic M, Bis JC, Eiriksdottir G, Lu C, et al. Meta-analysis of  
788 genome-wide association studies in >80 000 subjects identifies multiple loci for C-reactive  
789 protein levels. *Circulation*. 2011 Feb 22;123(7):731–8.
- 790 61. Neale BM, Medland SE, Ripke S, Asherson P, Franke B, Lesch K-P, et al. Meta-analysis of  
791 genome-wide association studies of attention-deficit/hyperactivity disorder. *J Am Acad*  
792 *Child Adolesc Psychiatry*. 2010 Sep;49(9):884–97.
- 793 62. Dupuis J, Langenberg C, Prokopenko I, Saxena R, Soranzo N, Jackson AU, et al. New  
794 genetic loci implicated in fasting glucose homeostasis and their impact on type 2 diabetes  
795 risk. *Nat Genet*. 2010 Feb;42(2):105–16.
- 796 63. Shungin D, Winkler TW, Croteau-Chonka DC, Ferreira T, Locke AE, Mägi R, et al. New  
797 genetic loci link adipose and insulin biology to body fat distribution. *Nature*. 2015 Feb  
798 12;518(7538):187–96.
- 799 64. Dastani Z, Hivert M-F, Timpson N, Perry JRB, Yuan X, Scott RA, et al. Novel loci for  
800 adiponectin levels and their influence on type 2 diabetes and metabolic traits: a multi-  
801 ethnic meta-analysis of 45,891 individuals. *PLoS Genet*. 2012;8(3):e1002607.



- 802 65. Perry JRB, Day F, Elks CE, Sulem P, Thompson DJ, Ferreira T, et al. Parent-of-origin-  
803 specific allelic associations among 106 genomic loci for age at menarche. *Nature*. 2014  
804 Oct 2;514(7520):92–7.
- 805 66. van der Harst P, Zhang W, Mateo Leach I, Rendon A, Verweij N, Sehmi J, et al. Seventy-  
806 five genetic loci influencing the human red blood cell. *Nature*. 2012 Dec 20;492(7429):369–  
807 75.
- 808 67. Shin S-Y, Fauman EB, Petersen A-K, Krumsiek J, Santos R, Huang J, et al. An atlas of  
809 genetic influences on human blood metabolites. *Nat Genet*. 2014 Jun;46(6):543–50.
- 810 68. Dickinson ME, Flenniken AM, Ji X, Teboul L, Wong MD, White JK, et al. High-throughput  
811 discovery of novel developmental phenotypes. *Nature*. 2016 22;537(7621):508–14.
- 812 69. Saito TL, Ohtani M, Sawai H, Sano F, Saka A, Watanabe D, et al. SCMD: *Saccharomyces*  
813 *cerevisiae* Morphological Database. *Nucleic Acids Res*. 2004 Jan 1;32(Database  
814 issue):D319-322.
- 815 70. Huang DW, Sherman BT, Lempicki RA. Bioinformatics enrichment tools: paths toward the  
816 comprehensive functional analysis of large gene lists. *Nucleic Acids Res*. 2009  
817 Jan;37(1):1–13.
- 818 71. Huang DW, Sherman BT, Lempicki RA. Systematic and integrative analysis of large gene  
819 lists using DAVID bioinformatics resources. *Nat Protoc*. 2009;4(1):44–57.
- 820 72. DAVID Bioinformatics Resources v.6.8 [Internet]. [cited 2019 Jan 14]. Available from:  
821 <https://david.ncifcrf.gov/>

822

## 824 **Figure Titles and Legends**

### 825 **Figure 1: Schematic of different types of pleiotropy.**

826 Previous studies distinguish between vertical pleiotropy, where effects on one trait are mediated  
827 through effects on another trait, and horizontal pleiotropy, where effects on multiple traits are  
828 independent.

### 829 **Figure 2: Contributions of linkage disequilibrium (LD) and polygenicity to horizontal** 830 **pleiotropy.**

831 In addition to the normal sense of horizontal pleiotropy, both linkage disequilibrium (LD) and  
832 polygenicity are expected to contribute to horizontal pleiotropy. In the case of LD-induced  
833 horizontal pleiotropy, two linked SNVs have independent effects on different traits which appear  
834 pleiotropic because of the linkage between the SNVs. In the case of polygenicity-induced  
835 horizontal pleiotropy, two highly polygenic traits have an overlap in their polygenic footprint.

### 836 **Figure 3: Two component pleiotropy score method.**

837 We (i) collect association statistics from the UK Biobank, (ii) process them using Mahalanobis  
838 whitening, (iii) compute the two components of our pleiotropy score ( $P_m$  and  $P_n$ ) based on the  
839 whitened association statistics, (iv) use LD scores to correct for LD-induced pleiotropy ( $P_m^{LD}$  and  
840  $P_n^{LD}$ ), and (v) use permutation-based  $P$ -values to correct for polygenic architecture ( $P_m^P$  and  $P_n^P$ ).

### 841 **Figure 4: Simulation study showing false positive rate (a,b,c,d) and power (e,f,g,h) of two-** 842 **component pleiotropy score.**

843 Top row shows performance on non-pleiotropic simulated variants (black line shows 5% false  
844 positive rate); bottom row shows performance on pleiotropic variants (black line shows 80%  
845 power). Simulations were run for both  $P_m^{LD}$  (left) and  $P_n^{LD}$  (right), and both without correction for

846 polygenicity (a,c,e,g) and with the correction (b,f,d,h), with per-variant heritability ranging from  
847 0.0002 to 0.2, proportion of non-pleiotropic causal loci ranging from 0 to 1%, and proportion of  
848 pleiotropic causal loci ranging from 0.1% to 1%. Our method has good power to detect  
849 pleiotropy for highly heritable traits, though its power is reduced by extreme polygenicity.  
850 Extreme polygenicity also increases the false positive rate, though this effect is corrected by our  
851 polygenicity correction.

852 **Figure 5: Quantile-quantile (Q-Q) plots showing the inflation of the pleiotropy score as a**  
853 **function of polygenicity.**

854 Variants are stratified into 4 batches of about 80 traits each by heritability, and then subdivided  
855 into 5 batches of about 20 traits each by polygenicity, as measured by corrected genomic  
856 inflation factor  $\lambda_{GC}^c$ . Darker shades represent low polygenicity and lighter shades represent high  
857 polygenicity. All panels show  $-\log_{10}$  transformed  $P$ -values. The black lines show the expected  
858 value under the null hypothesis.

859 **Figure 6: Distribution of the pleiotropy score among variants (a), genes (b), and traits (c).**

860 Panel a shows the global distribution of  $P_m^{LD}$  (left) and  $P_n^{LD}$  (right) for the 767,057 tested variants.  
861 The expected distribution under the null hypothesis of no pleiotropy is shown in red and the  
862 observed distribution is shown in blue. The vertical line represents the value of the pleiotropy  
863 score corresponding to genome-wide significance ( $P < 5 \times 10^{-8}$ ). 1,769 ( $P_m^{LD}$ ) and 643 ( $P_n^{LD}$ )  
864 variants are not represented for the sake of clarity, because they have extreme values for the  
865 pleiotropy score. Panel b shows the distribution of the average pleiotropy score for coding  
866 variants in each gene for  $P_m^{LD}$  (left) and  $P_n^{LD}$  (right). The top ten genes are represented on the  
867 right side of the plots, whereas genes with a pleiotropy score of 0 are represented on the left  
868 side of the plots. Panel c shows the contribution of pleiotropic variants to 82 complex traits and  
869 diseases. Contribution of pleiotropic variants is calculated as the correlation coefficient between

870 the absolute value of Z-scores and the pleiotropy score among variants that are genome-wide  
871 significant for the pleiotropy score ( $P < 5 \times 10^{-8}$  for  $P_m^{LD}$  and  $P_n^{LD}$  respectively).

872 **Figure 7: Replication analysis for the genome-wide pleiotropy study.**

873 We used 372 UK Biobank heritable medical traits as our discovery dataset, and independent  
874 datasets of 73 complex traits and diseases and 430 blood metabolites as replication datasets. In  
875 each case, expected fraction of replication was empirically determined using a permutation  
876 analysis.

877 **Tables**

878 **Table 1: Functional enrichment analysis of pleiotropy score.**

|                          |                                    | $P_m^{LD}$                                        | $P_n^{LD}$                                        |
|--------------------------|------------------------------------|---------------------------------------------------|---------------------------------------------------|
| Variant effect predictor | UTR                                | +0.24 ( $\pm 0.01$ ); $P = 1.72 \times 10^{-234}$ | +0.69 ( $\pm 0.02$ ); $P = 2.16 \times 10^{-236}$ |
|                          | coding synonymous                  | +0.24 ( $\pm 0.01$ ); $P = 2.49 \times 10^{-99}$  | +0.61 ( $\pm 0.03$ ); $P = 1.92 \times 10^{-76}$  |
|                          | non synonymous                     | +0.19 ( $\pm 0.01$ ); $P = 3.82 \times 10^{-82}$  | +0.48 ( $\pm 0.03$ ); $P = 3.62 \times 10^{-62}$  |
| Roadmap Epigenomics      | H327ac                             | +0.20 ( $\pm 0.01$ ); $P < 10^{-308}$             | +0.54 ( $\pm 0.01$ ); $P < 10^{-308}$             |
|                          | H3K27me3                           | +0.02 ( $\pm 0.01$ ); $P = 1.40 \times 10^{-18}$  | +0.01 ( $\pm 0.01$ ); $P = 0.4$                   |
|                          | Active TSS                         | +0.20 ( $\pm 0.02$ ); $P = 1.42 \times 10^{-36}$  | +0.54 ( $\pm 0.04$ ); $P = 8.56 \times 10^{-34}$  |
|                          | Promoter Upstream TSS              | +0.16 ( $\pm 0.01$ ); $P = 4.44 \times 10^{-130}$ | +0.43 ( $\pm 0.02$ ); $P = 4.33 \times 10^{-103}$ |
|                          | Promoter Downstream TSS 1          | +0.35 ( $\pm 0.01$ ); $P = 1.87 \times 10^{-220}$ | +0.92 ( $\pm 0.03$ ); $P = 3.59 \times 10^{-197}$ |
|                          | Promoter Downstream TSS 2          | +0.30 ( $\pm 0.01$ ); $P = 2.70 \times 10^{-203}$ | +0.86 ( $\pm 0.03$ ); $P = 3.44 \times 10^{-210}$ |
|                          | Transcribed - 5' preferential      | +0.29 ( $\pm 0.01$ ); $P < 10^{-308}$             | +0.88 ( $\pm 0.01$ ); $P < 10^{-308}$             |
|                          | Transcription Strong transcription | +0.38 ( $\pm 0.01$ ); $P < 10^{-308}$             | +1.10 ( $\pm 0.01$ ); $P < 10^{-308}$             |
|                          | Transcribed - 3' preferential      | +0.29 ( $\pm 0.01$ ); $P < 10^{-308}$             | +0.82 ( $\pm 0.01$ ); $P < 10^{-308}$             |

|                            |                                                  |                                                   |                                                   |
|----------------------------|--------------------------------------------------|---------------------------------------------------|---------------------------------------------------|
| Transcription & regulation | Weak transcription                               | +0.21 ( $\pm 0.01$ ); $P < 10^{-308}$             | +0.60 ( $\pm 0.01$ ); $P < 10^{-308}$             |
|                            | Transcribed & regulatory (Prom/Enh)              | +0.36 ( $\pm 0.01$ ); $P < 10^{-308}$             | +1.00 ( $\pm 0.02$ ); $P < 10^{-308}$             |
|                            | Transcribed 5' preferential and Enh              | +0.35 ( $\pm 0.01$ ); $P < 10^{-308}$             | +1.00 ( $\pm 0.01$ ); $P < 10^{-308}$             |
|                            | Transcribed 3' preferential and Enh              | +0.33 ( $\pm 0.01$ ); $P < 10^{-308}$             | +0.92 ( $\pm 0.02$ ); $P < 10^{-308}$             |
|                            | Transcribed and Weak Enhancer                    | +0.32 ( $\pm 0.01$ ); $P < 10^{-308}$             | +0.97 ( $\pm 0.01$ ); $P < 10^{-308}$             |
| Active enhancer            | Active Enhancer 1                                | +0.13 ( $\pm 0.01$ ); $P = 4.54 \times 10^{-295}$ | +0.32 ( $\pm 0.01$ ); $P = 5.1 \times 10^{-216}$  |
|                            | Active Enhancer 2                                | +0.11 ( $\pm 0.01$ ); $P = 2.64 \times 10^{-294}$ | +0.28 ( $\pm 0.01$ ); $P = 5.63 \times 10^{-238}$ |
|                            | Active Enhancer Flank                            | +0.11 ( $\pm 0.01$ ); $P < 10^{-308}$             | +0.29 ( $\pm 0.01$ ); $P = 6.06 \times 10^{-270}$ |
| Weak enhancer              | Weak Enhancer 1                                  | +0.07 ( $\pm 0.01$ ); $P = 2.79 \times 10^{-89}$  | +0.16 ( $\pm 0.01$ ); $P = 6.89 \times 10^{-60}$  |
|                            | Weak Enhancer 2                                  | +0.08 ( $\pm 0.01$ ); $P < 10^{-308}$             | +0.23 ( $\pm 0.01$ ); $P = 6.52 \times 10^{-291}$ |
|                            | Primary H3K27ac possible Enhancer                | +0.09 ( $\pm 0.01$ ); $P = 2.72 \times 10^{-259}$ | +0.24 ( $\pm 0.01$ ); $P = 1.53 \times 10^{-187}$ |
|                            | Primary DNase                                    | +0.03 ( $\pm 0.01$ ); $P = 3.83 \times 10^{-21}$  | +0.05 ( $\pm 0.01$ ); $P = 1.11 \times 10^{-7}$   |
| ZNF genes & repeats        | +0.08 ( $\pm 0.01$ ); $P = 1.29 \times 10^{-7}$  | +0.20 ( $\pm 0.04$ ); $P = 6.9 \times 10^{-7}$    |                                                   |
| Heterochromatin            | -0.20 ( $\pm 0.01$ ); $P < 10^{-308}$            | -0.61 ( $\pm 0.01$ ); $P < 10^{-308}$             |                                                   |
| Poised Promoter            | +0.05 ( $\pm 0.01$ ); $P = 1.03 \times 10^{-35}$ | +0.09 ( $\pm 0.01$ ); $P = 2.27 \times 10^{-16}$  |                                                   |
| Bivalent Promoter          | +0.17 ( $\pm 0.01$ ); $P = 1.28 \times 10^{-93}$ | +0.51 ( $\pm 0.03$ ); $P = 6.29 \times 10^{-88}$  |                                                   |

|                                                     |                    |                                            |                                            |
|-----------------------------------------------------|--------------------|--------------------------------------------|--------------------------------------------|
|                                                     | Repressed Polycomb | +0.04 (±0.01); $P = 5.77 \times 10^{-42}$  | +0.06 (±0.01); $P = 1.48 \times 10^{-11}$  |
|                                                     | Quiescent/Low      | -0.41 (±0.01); $P < 10^{-308}$             | -1.20 (±0.01); $P < 10^{-308}$             |
| GTEx - number of genes the variant is an eQTL for   | eGenes<10          | +0.11 (±0.01); $P = 6.78 \times 10^{-186}$ | +0.28 (±0.01); $P = 1.04 \times 10^{-140}$ |
|                                                     | eGenes>10 & <15    | +0.19 (±0.01); $P = 4.72 \times 10^{-114}$ | +0.52 (±0.02); $P = 6.84 \times 10^{-99}$  |
|                                                     | eGenes>15 & <20    | +0.31 (±0.02); $P = 7.98 \times 10^{-52}$  | +0.88 (±0.06); $P = 5.38 \times 10^{-47}$  |
|                                                     | eGenes>20          | +0.66 (±0.06); $P = 3.40 \times 10^{-27}$  | +2.07 (±0.18); $P = 1.35 \times 10^{-30}$  |
| GTEx - number of tissues the variant is an eQTL for | eTissue<30         | +0.10 (±0.01); $P = 1.84 \times 10^{-151}$ | +0.26 (±0.01); $P = 1.26 \times 10^{-114}$ |
|                                                     | eTissue>30 & <35   | +0.21 (±0.01); $P = 3.70 \times 10^{-187}$ | +0.54 (±0.02); $P = 6.80 \times 10^{-147}$ |
|                                                     | eTissue>35 & <40   | +0.36 (±0.02); $P = 1.11 \times 10^{-82}$  | +1.13 (±0.06); $P = 4.24 \times 10^{-92}$  |
|                                                     | eTissue>40         | +0.35 (±0.05); $P = 2.42 \times 10^{-13}$  | +0.97 (±0.14); $P = 7.08 \times 10^{-12}$  |
| International Mouse Phenotyping Consortium          | Phenotypes > 1     | +0.06 (±0.01); $P = 1.91 \times 10^{-6}$   | +0.19 (±0.04); $P = 2.70 \times 10^{-7}$   |
| Saccharomyces cerevisiae Morphological Database     | Phenotypes > 1     | +0.09 (±0.01); $P = 4.48 \times 10^{-17}$  | +0.26 (±0.03); $P = 1.53 \times 10^{-18}$  |

879

880 We grouped variants by (i) molecular function as annotated by Ensembl, (ii) predicted chromatin state as annotated by the NIH

881 Roadmap Epigenomics Project, (iii) transcriptional effects as annotated by the NIH Genotype-Tissue Expression (GTEx) Project, and

882 (iv) effects on model organism phenotypes as annotated by the International Mouse Phenotyping Consortium (IMPC) and

883 Saccharomyces Cerevisiae Morphological Database (SCMD). For each grouping, we computed the mean LD-corrected pleiotropy  
884 score and used a two-sample Student's t-test to determine whether the mean was significantly different from the baseline. We found  
885 (i) that coding regions have higher pleiotropy scores than noncoding regions, (ii) that active promoters and enhancers have the  
886 highest pleiotropy scores and quiescent and heterochromatin have the lowest, (iii) that variants that control expression of more genes  
887 in more tissues have higher pleiotropy scores, and (iv) that genes associated with more than one model organism phenotype have  
888 higher pleiotropy scores.



## 889 **Additional Files**

### 890 **Additional File 1. Functional enrichment analysis of pleiotropy score after applying** 891 **polygenicity correction.**

892 Excel spreadsheet (.xlsx) showing the equivalent of Table 1 using the LD/polygenicity-corrected  
893 scores ( $P_m^P$  and  $P_n^P$ ) instead of the LD-corrected scores ( $P_m^{LD}$  and  $P_n^{LD}$ )

### 894 **Additional File 2. DAVID enrichment analysis of high-pleiotropy genes.**

895 Excel spreadsheet (.xlsx) showing the results of the DAVID enrichment analysis described in  
896 the text.

## Vertical Pleiotropy

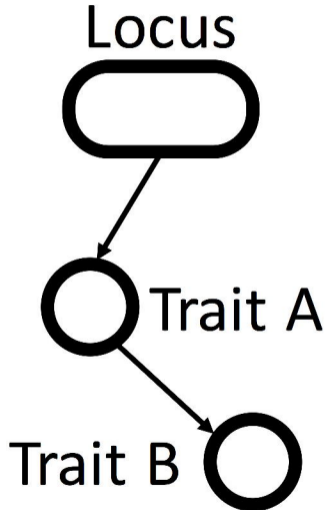

## Horizontal Pleiotropy

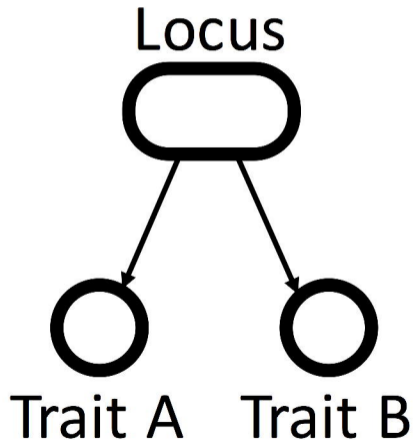

## Biological (single-locus) Horizontal Pleiotropy

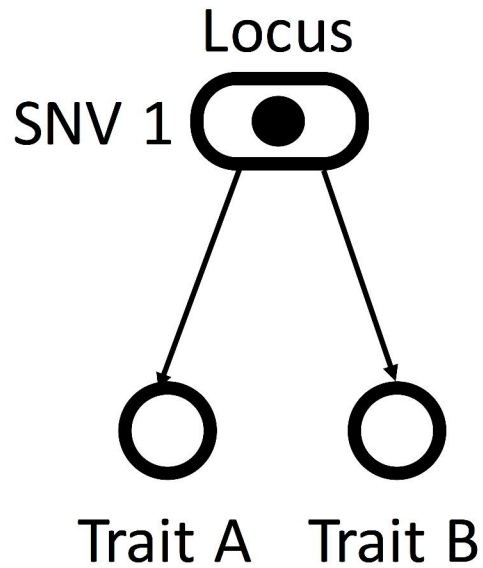

## LD-Induced Horizontal Pleiotropy

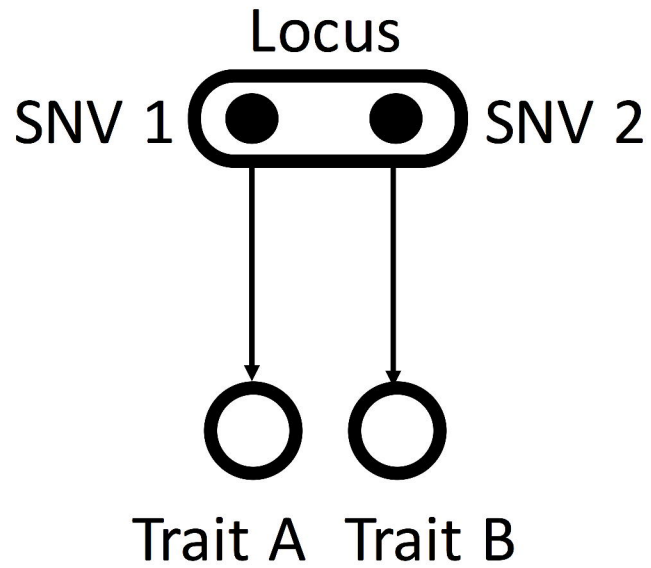

## Polygenicity-Induced Horizontal Pleiotropy Causal Loci

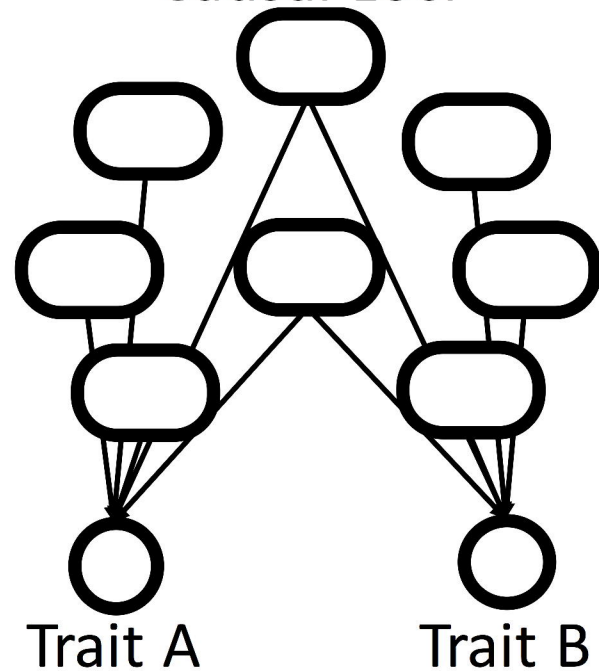

# Collection of UK Biobank association summary statistics

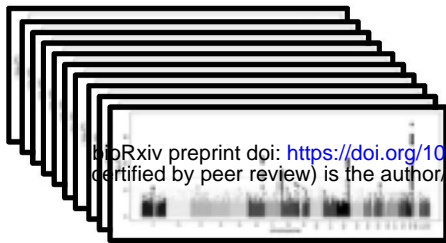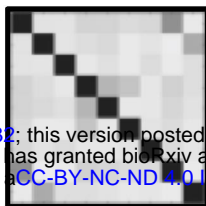

bioRxiv preprint doi: <https://doi.org/10.1101/311332>; this version posted August 13, 2019. The copyright holder for this preprint (which was not certified by peer review) is the author/funder, who has granted bioRxiv a license to display the preprint in perpetuity. It is made available under aCC-BY-NC-ND 4.0 International license.

*Mahalanobis whitening  
(remove trait correlations)*

Whitened (uncorrelated) association statistics

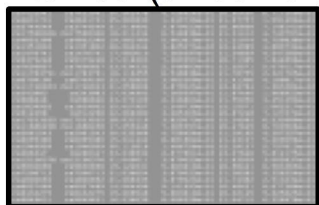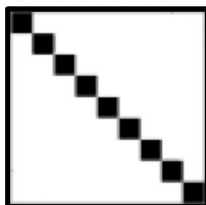

*Sum squared  
association statistics*

*Counts of nominally  
significant whitened traits*

**Magnitude pleiotropy  
score ( $P_m$ )**

**Number of traits  
pleiotropy score ( $P_n$ )**

*Correction for LD*

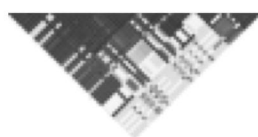

**LD-corrected  
Magnitude pleiotropy  
score ( $P_m^{LD}$ )**

**LD-corrected  
Number of traits  
pleiotropy score ( $P_n^{LD}$ )**

*Correction for polygenicity*

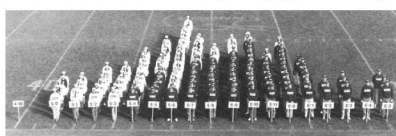

**Polygenicity-corrected  
Magnitude pleiotropy  
score ( $P_m^P$ )**

**Polygenicity-corrected  
Number of traits  
pleiotropy score ( $P_n^P$ )**

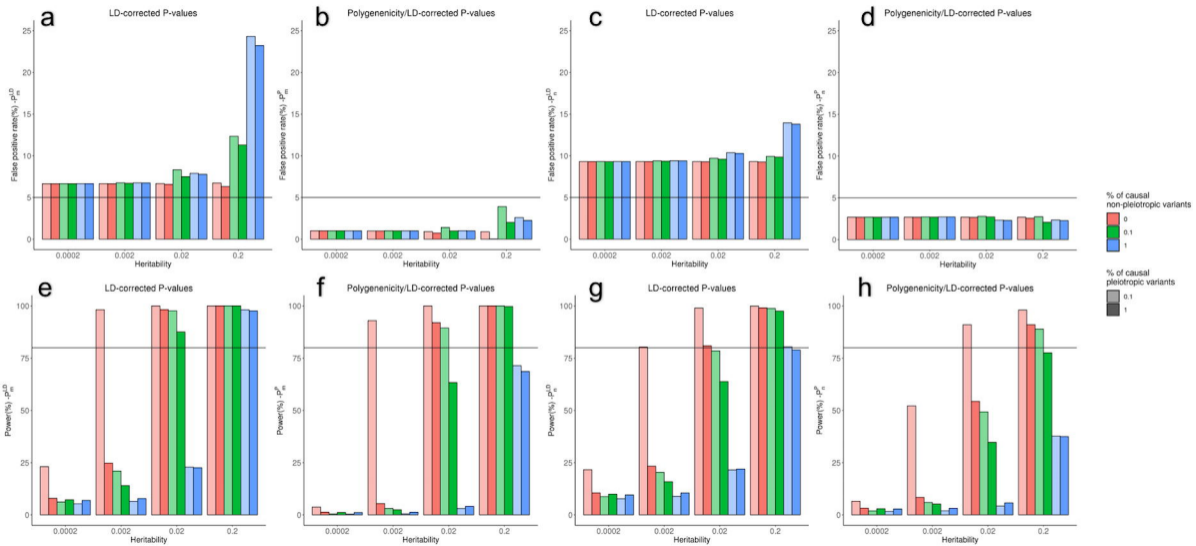

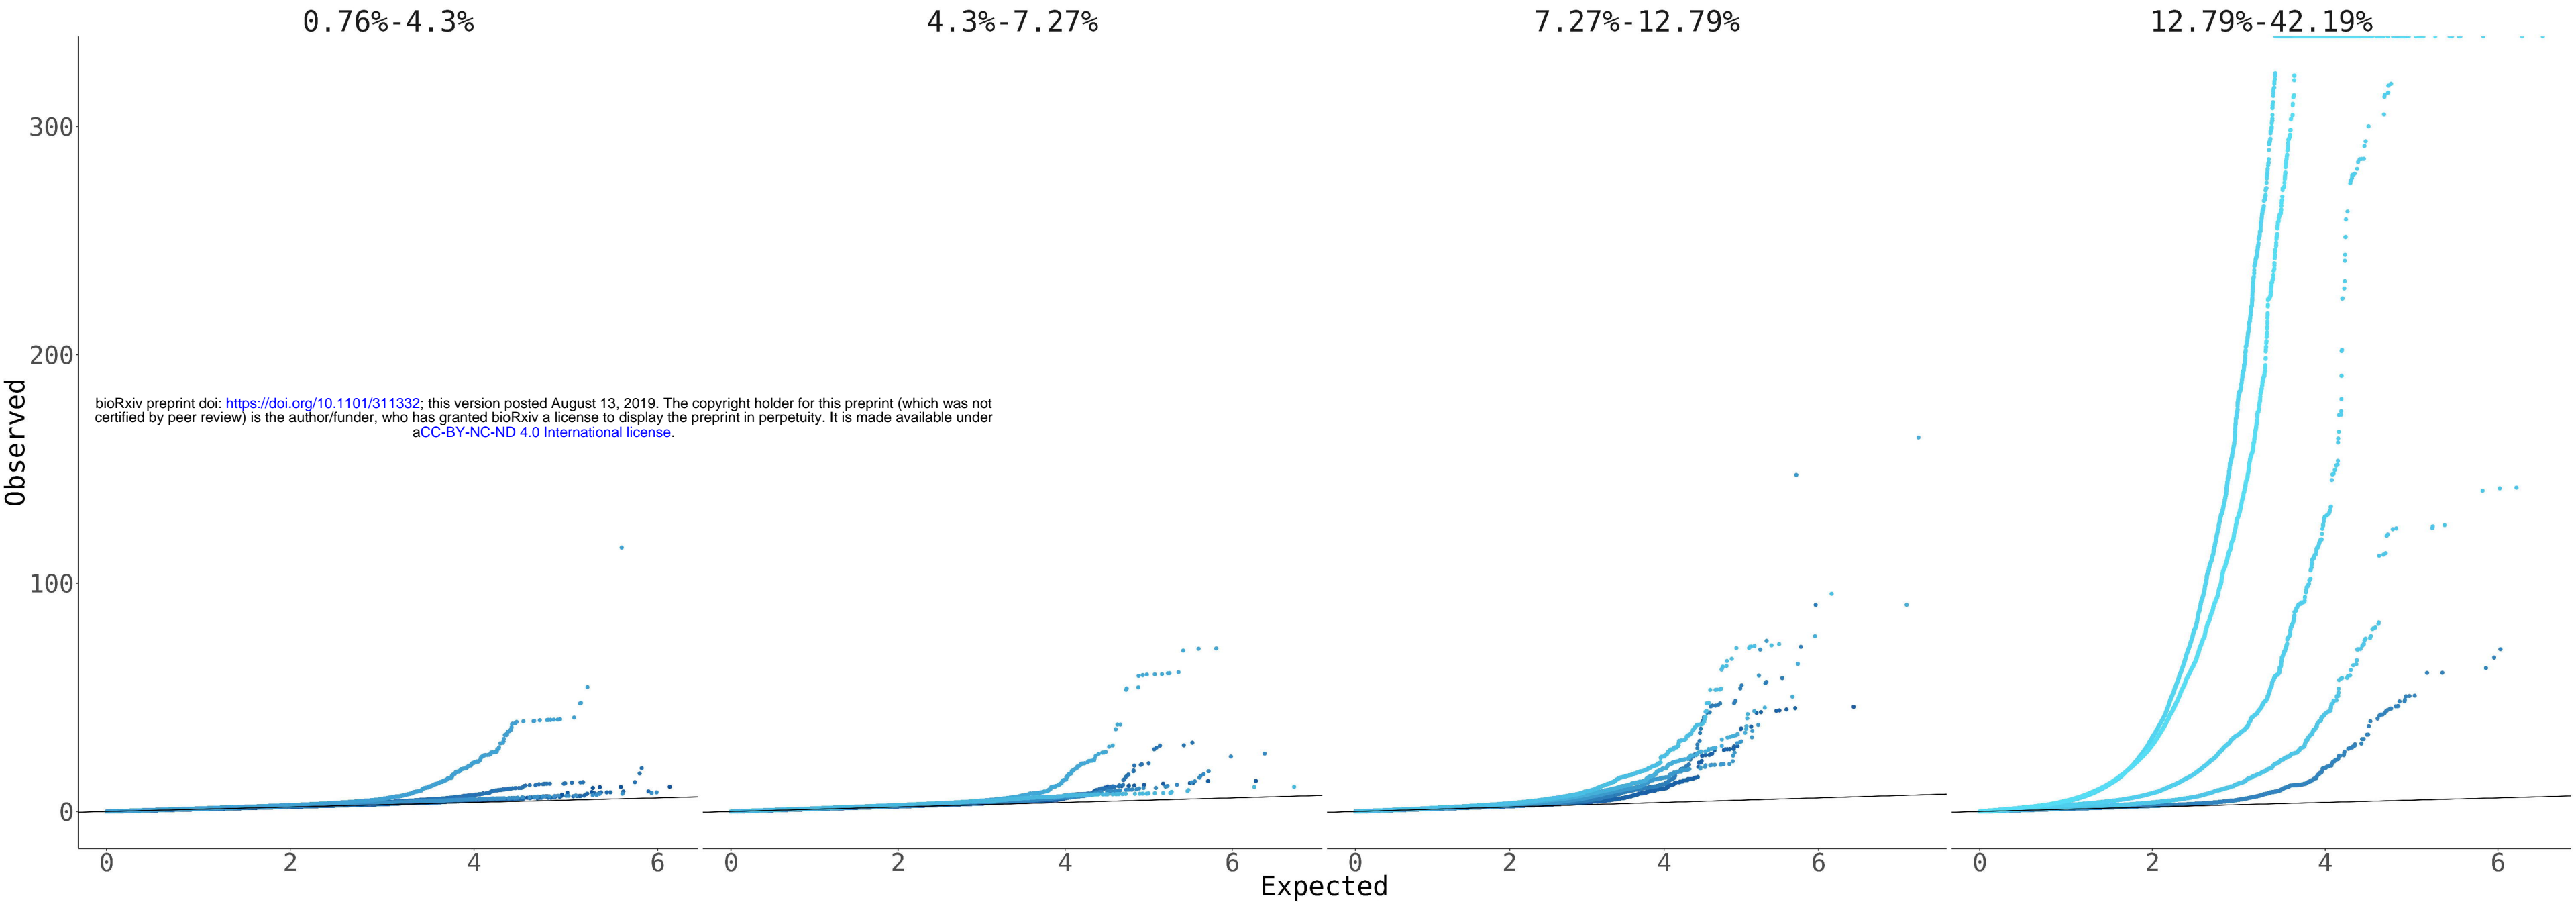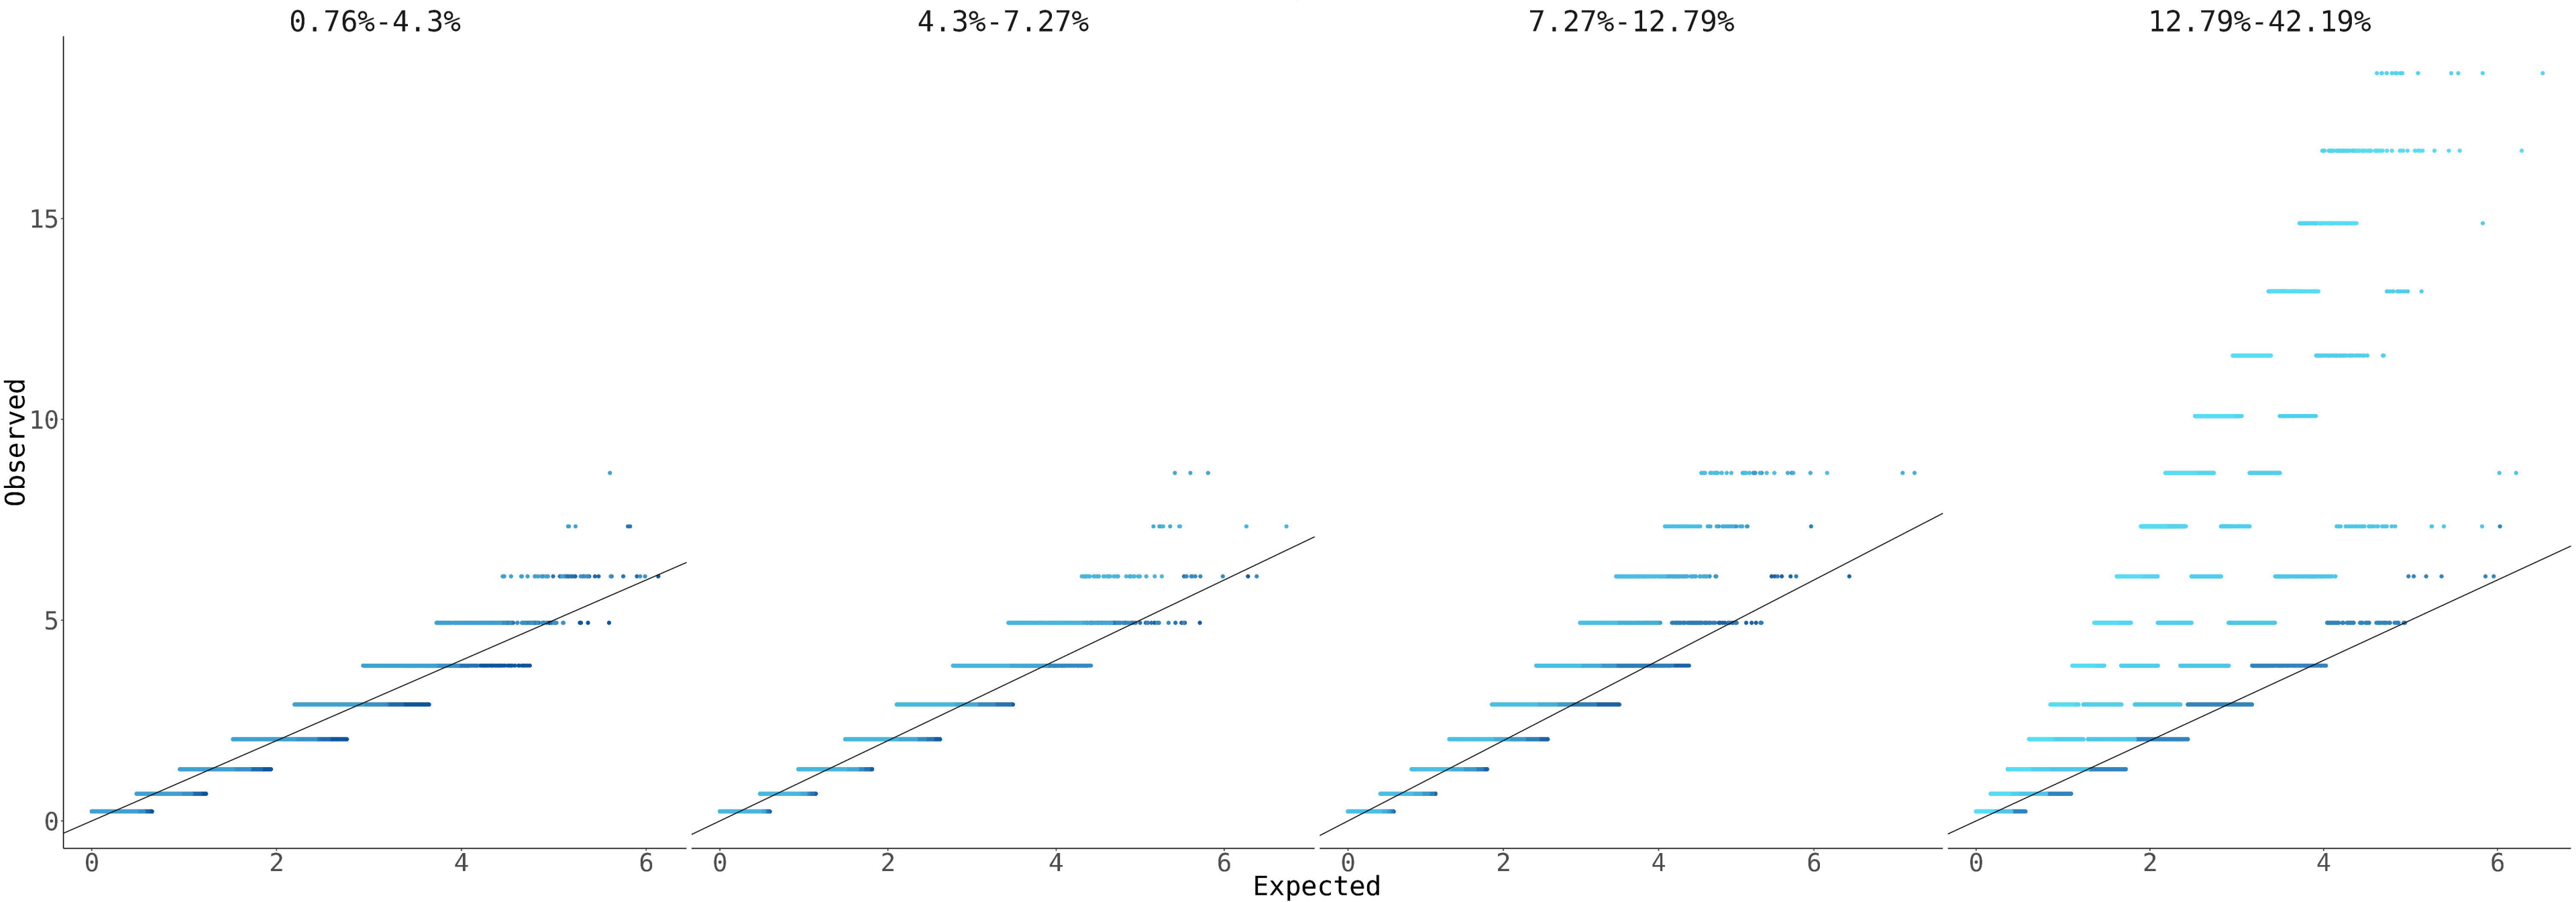

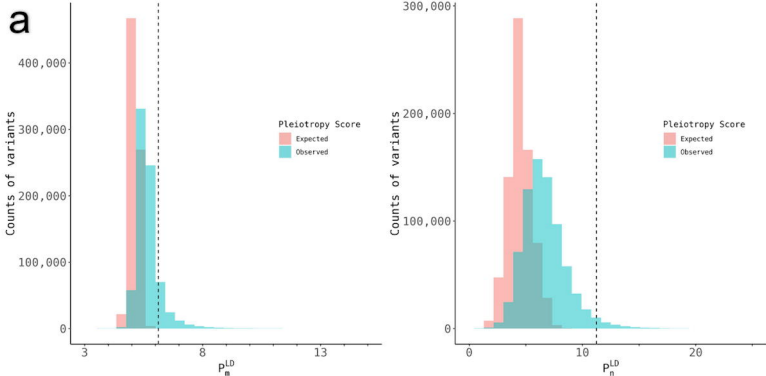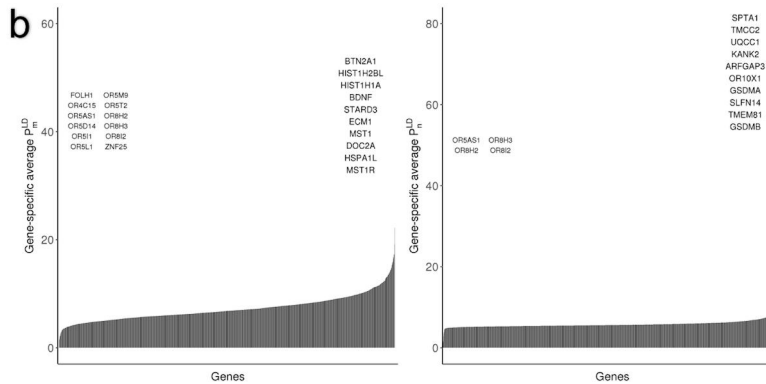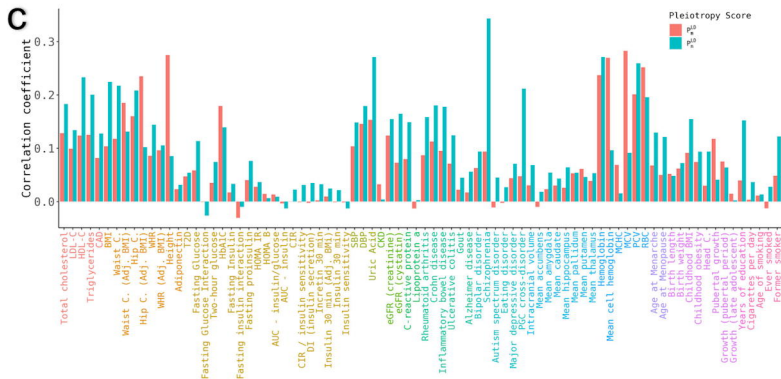

# Discovery

 $P_m^{LD}$ **7,831***Expected 0*372 UK Biobank  
phenotypes $P_n^{LD}$ **2,520***Expected 0*372 UK Biobank  
phenotypes*Independent loci*  
 $P < 5 \times 10^{-8}$ 

# Replication

**4,452 (57%)***Expected 360 (5%)*73 complex traits  
& diseases**1,358 (17%)***Expected 351 (5%)*

430 metabolites

**958 (38%)***Expected 157 (6%)*73 complex traits  
& diseases**299 (12%)***Expected 155 (6%)*

430 metabolites

*Replicated loci*  
 $P < 0.05$
